# Supplementary material
Source: HighWire-hosted journal article supplement (https://jitc.bmj.com/content/9/8/e002804)
Supplement: inline-supplementary-material-3 [file inline-supplementary-material-3.xlsx]

## Sheet: PRE
Patient ID	PNEUMONITIS_0vsOther	CD14_NK1PRE	CD14-_NK1PRE	CD3+_NK1PRE	CD3+/CD56+CD16+_NK1PRE	CD3+/CD56+CD16-_NK1PRE	CD3+/CD56+CD107a+_NK1PRE	CD3+/CD56+CD107a-_NK1PRE	CD3+/CD56+CTLA4+_NK1PRE	CD3+/CD56+CTLA4-_NK1PRE	CD3+/CD56+NKp44+_NK1PRE	CD3+/CD56+NKp44-_NK1PRE	CD3+/CD56-CD16+_NK1PRE	CD3+/CD56-CD107a+_NK1PRE	CD3+/CD56-CTLA4+_NK1PRE	CD3+/CD56-NKp44+_NK1PRE	NKcells_NK1PRE	NKcells/CD56+CD16+_NK1PRE	NKcells/CD56+CD16-_NK1PRE	NKcells/CD56+CD107a+_NK1PRE	NKcells/CD56+CD107a-_NK1PRE	NKcells/CD56+CTLA4+_NK1PRE	NKcells/CD56+CTLA4-_NK1PRE	NKcells/CD56+NKp44+_NK1PRE	NKcells/CD56+NKp44-_NK1PRE	CD14_NK2PRE	CD14-_NK2PRE	CD3+_NK2PRE	CD3+/CD56+CD16+_NK2PRE	CD3+/CD56+CD16-_NK2PRE	CD3+/CD56+CD69+_NK2PRE	CD3+/CD56+CD69-_NK2PRE	CD3+/CD56+NKG2D+_NK2PRE	CD3+/CD56+NKG2D-_NK2PRE	CD3+/CD56+PD1+_NK2PRE	CD3+/CD56+PD1-_NK2PRE	CD3+/CD56-CD16+_NK2PRE	CD3+/CD56-CD69+_NK2PRE	CD3+/CD56-NKG2D+_NK2PRE	CD3+/CD56-PD1+_NK2PRE	CD3+/NKG2D+PD1+_NK2PRE	CD3+/NKG2D+PD1-_NK2PRE	CD3+/NKG2D-PD1+_NK2PRE	NKcells_NK2PRE	NKcells/CD56+CD16+_NK2PRE	NKcells/CD56+CD16-_NK2PRE	NKcells/CD56+CD69+_NK2PRE	NKcells/CD56+CD69-_NK2PRE	NKcells/CD56+NKG2D+_NK2PRE
1	0
2	0
3	1
6	0
7	0
9	1
11	0
12	0
13	0
14	0
15	1
16	0
17	1
18	0
19	0
20	1	42	38	39.8	1.53	0.14	0	1.94	0	1.57	0	1.44	71.8	0.67	0.44	0.44	1.78	88.6	1.55	2.07	91.7	0	80.3	4.15	81.3	42.6	38.8	37.7	1.68	0.24	0.11	2.05	1.89	0.11	0.044	1.65	64.5	3.16	29.9	0.81	0.48	24.1	0.37	1.54	92	1.6	18.1	79.3	68.6
21	0	36.6	37.9	49.9	1.92	0.11	0	2.62	0.011	2.12	0.032	2.22	61	0.8	0.62	0.53	1.23	81.6	3.51	1.32	81.1	0.88	69.3	1.32	71.5	35.9	39.6	48.2	2.65	0.14	0.36	2.8	3.16	0.2	0.16	2.2	64.3	4.39	40.1	6.29	3	27.1	2.67	0.95	85.8	2.19	26.2	68.9	92.9
22	0	28.1	47.7	26.8	1.55	0.21	0.012	1.68	0.085	1.53	0.89	0.88	50.7	1.29	0.89	1.38	13.4	94.2	0.54	0.32	85.9	0.93	73	6.05	75.1	26	49.9	28.2	1.69	0.14	0.17	1.63	1.79	0.15	0.84	1.16	60.7	2.4	24.3	6.94	3.62	17.7	3.1	10.8	92.5	0.57	8.33	81.4	96.1
23	0	27.4	48.4	39.1	1.31	0.44	0.00625	1.81	0.00625	1.54	0.00625	1.56	42.8	0.13	0.081	0.24	12.4	93	1.3	0.4	91	0.2	74.4	0.3	80.4	26	50.2	38.7	1.61	0.28	0.15	1.91	1.51	0.54	0.023	1.66	50	0.74	22.2	0.21	0.064	17.5	0.13	11.4	93	1.2	72.9	27.5	68.7
24	0	30.5	54.9	50.8	5.1	0.23	0.0083	6.36	0.017	4.94	0.0083	5.12	77.8	0.37	0.31	0.56	2.51	86.7	0.17	4.54	86.2	1.68	73.9	4.37	69.1	29.6	53.9	48.9	5.43	0.061	0.94	5.59	4.95	1.16	0.44	5.05	82.6	2.95	42.4	15.3	7.21	32.2	6.76	2.17	84.1	0.82	6.04	84.9	69.5
26	0	37	51.2	48.5	5.33	1.54	0.011	7.32	0.00544	5.69	0.038	5.72	50	0.13	0.087	0.31	6.54	92.2	0.85	1.37	89.6	0.16	69.7	1.73	81	39	49.3	48.5	6.91	0.7	0.49	7.13	6.67	0.96	0.79	5.67	66.3	1	27.4	16.7	6.11	22.8	8.01	5.64	94.1	0.38	7.94	82.5	88.6
27	1	52.1	31.7	40.2	7.43	0.18	0.048	8.15	0.048	7.17	0.064	6.63	73.1	0.32	0.5	0.3	9.29	87.8	0.069	2.35	87.7	1.31	75.1	4.56	71.4	53.7	43.6	47.1	14.5	2.03	0.7	17.6	9.44	6.56	0.7	14.4	63.7	1.25	16.2	2.57	1.87	18.3	1.02	15.9	82.7	0.93	15.3	76.7	63.1
28	0	13.8	55.7	37.4	0.88	0.1	0	1.15	0	0.96	0.12	0.88	75.1	1.15	0.7	0.59	1.33	89.6	2.31	1.73	92.5	1.16	76.9	4.05	71.7	12.9	56.4	35.5	0.92	0.071	0.12	1.14	0.89	0.23	0.16	0.96	80.1	3.47	32.1	4.43	1.83	24.2	2.17	1.28	85.1	0.5	6.93	88.1	88.6
29	1	24.4	53.6	39.9	3.74	0.2	0.00925	4.48	0.00925	3.77	0.00925	3.89	65.7	0.46	0.39	0.41	4.75	87.1	0.85	0.78	87	0.23	72.4	1.32	76.1	27.2	54.9	36.4	2.97	0.091	0.12	3.39	2.88	0.9	0.12	2.82	67.3	1.93	18.4	7.04	3.76	13.1	2.66	4.52	86.4	1.16	6.41	88	81.4
30	0
31	0
32	1	36	51.5	37.1	2.57	0.39	0.66	2.76	0	2.89	0.028	2.42	46.7	24.1	0.49	0.71	14.5	94.9	1.18	45.2	57.1	0.65	83.8	0.79	80.5	39.1	49.8	35.9	2.51	0.96	1.5	2.45	2.8	0.76	0.14	3.11	43.2	23.1	18.8	7.4	2.04	16.4	4.46	12.8	95.4	1.8	71.7	29.6	76.9
33	0	11.4	72.3	38.2	2.05	0.85	0	3.42	0.3	2.5	0.13	2.31	48.9	0.2	4.69	3.48	4.31	84.1	7.26	2.79	85.6	11.2	65.5	15.8	51.5	10.4	66	40.1	2.43	0.47	2.09	1.66	1.71	1.09	0.5	2.26	59.7	18.5	36.4	8.11	4.62	22.7	2.99	2.69	76.6	4.11	70.2	27	65
34	0	38.4	38.6	52.7	5.97	0.69	0	7.94	0	7.14	0	6.95	60.9	0.089	0.074	0.089	0.89	81.9	2.2	0.88	85.9	0.88	73.6	2.64	70	35.5	43.2	54.4	8.03	1.06	0.42	9.16	7.82	1.84	0.4	7.72	59.9	2.83	24.3	3.3	1.71	22.9	1.58	0.77	93	2.82	12	83.8	95.8
35	1	43.4	43.8	45.2	8.28	1.29	0.01	9.96	0.016	7.79	0.021	8	65	0.16	0.24	0.062	16.2	95.2	0.26	0.28	91.8	0.17	74.2	1.29	82.9	44.4	43.8	45.7	9.02	0.89	0.31	9.81	9	1.28	0.042	8.46	69.8	1.31	33.3	1.15	0.28	32.3	0.69	14.8	95.1	0.35	5.89	88.7	76.3
36	1	26.1	57.1	57.8	20.1	17.4	0.017	36.5	0.048	30.1	0.15	28	21.9	0.025	0.058	0.17	9.96	97.3	1.18	0.14	89.5	0.19	72.9	0.45	70.8	25.2	59.1	58.1	26.3	12.7	1.35	35.7	23.4	13.9	0.21	30.1	29.9	1.26	18.7	0.83	0.44	31.4	0.46	9.51	97.3	1.08	6.54	86.3	60.1
37	0	29.3	53.4	46	0.36	0.2	0	0.73	0	0.58	0.00778	0.47	70.6	0.11	0.25	0.17	1.58	93	2.49	0.23	87.1	1.13	71	0.9	67.9	28.3	55.1	46	0.39	0.27	0.47	0.36	0.2	0.45	0.026	0.61	70.9	1.66	14.7	0.45	0.18	11.5	0.24	1.59	92.1	3.95	16	76.5	59
38	0	25.2	55.3	57.7	6.33	2.65	0.00594	9.16	0.00832	7.56	0.00475	7.08	51.2	0.043	0.067	0.077	3.8	92.2	0.5	0.11	90.5	0.14	74.2	0.22	74.4	25.6	57.8	58.5	6.84	2.9	0.35	9.35	2.27	6.07	3.8	6.07	50	0.92	21.5	7.29	1.8	16.8	6.85	3.92	93.7	0.81	5.39	88.6	71.9
39	0	9.25	76.1	56.5	1.23	0.87	0	2.21	0.00253	1.8	0.013	1.7	35	0.035	0.15	0.11	2.64	92.6	4.28	0.38	91.1	0.33	76.2	0.7	71.7	8.58	77.3	58.1	1.35	0.79	0.24	1.95	1.42	0.71	0.025	1.75	39	3.4	20.2	1.62	0.31	15.7	1.04	2.48	91	5.01	85.2	14.8	56.5
40	0	20.9	65.3	63.5	12.2	13.5	0.00358	25.5	0.00537	21.3	0.034	18.8	21.5	0.047	0.032	0.047	1.78	91.6	7.65	0.13	95.2	0	78.5	0.13	78.7	21.1	65.8	63.4	15.6	10.6	0.19	25.2	6.67	15.6	6.08	19	27.9	0.68	23.2	2.81	1.35	22.2	5.91	1.48	91.2	8.19	2.57	92.4	92.9
42	0	16.3	61.2	24.4	5.04	0.63	0	6.13	0	5.03	0.042	4.87	62.6	0.052	0.1	0.16	0.67	91.6	3.07	0.19	93.1	0.19	75.9	6.13	71.3	15.1	64.3	26	4.99	0.93	0.42	5.78	4.63	1.44	0.16	5.31	58	4.1	24.8	1.62	0.64	23	0.83	0.56	85.6	5.62	23.8	71	62
43	0	21.5	65.8	53	3.33	0.53	0.00189	4.44	0	3.56	0.00944	3.33	62.4	0.034	0.059	0.028	4.38	94.5	2.4	0.046	92.2	0.32	76.4	1.23	75.7	22.2	63.9	53.1	3.89	0.46	0.11	4.56	2.97	1.44	0.00316	3.46	67.2	1.48	33.1	0.34	0.051	26.4	0.24	4	94.2	2.83	19.2	77.9	29.2
44	0	33.8	55.1	50.5	10.5	0.47	0.016	12.8	0.016	10.3	0.04	9.84	71.2	0.079	0.18	0.095	7.86	91.7	0.81	0.46	93.9	0.1	76.3	0.25	73.6	35.3	53.7	50.6	14.1	0.62	1.44	15.1	10.7	5.1	0.11	12.9	70.4	5.09	26.4	1.24	0.39	29.2	0.8	7.72	93.6	1.5	18.1	80.3	60.6
45	1	28.2	54.3	35.6	2.37	1.45	0.012	4.08	0.012	3.09	0	3.11	57.1	0.058	0.16	0.058	16.4	95	1.13	0.55	92.3	0.35	72.1	0.18	76.7	29	53.1	36	3.02	1	0.63	3.57	1.34	2.61	0.00944	3.26	67.6	3.87	11.8	0.39	0.13	10.4	0.22	14.8	94.5	0.8	14.4	82.6	46.3
46	0	15.3	67.9	47.3	0.99	0.15	0.013	1.43	0.00423	1.1	0.00423	1.09	64.9	0.27	0.27	0.21	8.13	89.8	1.08	0.84	93.5	0.17	72.1	0.37	74.3	14.4	68.9	47.6	1.04	0.11	0.11	1.25	0.89	0.33	0.00499	0.96	70.3	1.23	22.1	0.22	0.065	17.3	0.11	7.68	88.9	1.21	22.2	78.4	66.3
47	0	45.4	46.7	51.3	10.6	4.88	0.013	16	0.00641	12.8	0.00641	11.4	40.7	0.058	0.14	0.064	3.67	92	2.42	0.45	93.6	0	74.5	0.09	75.1	42.2	50.2	50.9	12.4	2.91	0.81	15	14.9	1.19	2.3	10.3	50.1	0.75	15	17.9	6.6	17.4	9.93	2.95	90.7	2.07	11.7	85.6	86
48	1	33.5	57.1	48.8	1.69	0.37	0	2.31	0	1.85	0	1.85	76	0.06	0.053	0.13	2.61	87.3	2	1.75	92.9	0.62	76.6	3.37	71.2	31.2	53.8	33.4	1.7	0.42	0.33	1.91	1.17	0.93	0.46	1.53	77.2	2.85	22.9	14	5.03	15.2	7.62	1.83	90.2	3.55	13.6	85	45.5
49	0	23.2	58.6	45.6	1.96	0.99	0.00559	3.28	0.019	2.58	0.013	2.41	43.5	0.065	0.17	0.14	8.11	95.2	2.2	0.34	94.9	0.46	73.2	0.35	70.8	26.8	57	43	2.48	1.42	0.67	3.64	2.59	1.48	0.27	3.48	46.2	2.16	26.2	8.72	3.06	21.6	4.62	8.72	94.1	3.25	31.3	68.6	70.5
50	0	19.4	66.1	64.9	16.8	4.5	0.049	21.7	0.025	18	0.016	17.9	50.1	0.15	0.1	0.044	1.97	92.8	2.77	0.72	84.9	0.16	69.3	1.1	73.6	18.8	70.8	65.3	16.7	5.73	0.26	21.7	13.6	9.82	1.88	17.2	45.2	0.91	21.7	17.1	6.01	23.7	10.5	1.78	94.7	2.93	4.81	86.1	53.4
51	0	36.1	54.8	51.9	13.7	6.93	0.036	20.4	0.024	17.4	0.019	15.2	38.2	0.11	0.063	0.053	5.26	94.7	1.86	0.69	87.8	0.12	72.7	0.079	69.4	36.7	55.3	51.9	15.7	4.97	0.79	19.2	10.6	10.3	0.62	14.2	43.3	1.76	21.4	13.5	4.09	19.2	7.9	4.84	95	1.53	72.9	27.2	40.2
52	0	21.1	66.5	59.5	3.2	0.43	0.00289	4.19	0.00506	3.36	0.00506	3.27	63.9	0.072	0.09	0.043	1.25	89.3	2.93	0.69	86.6	0.28	71.9	0.45	74.1	21.9	66.8	56.2	3.77	0.55	0.37	4.37	1.87	2.38	1.3	2.94	62.4	1.59	24.3	30.9	11.1	12.6	17.6	1.16	92.7	3.87	60.8	38.3	32.9
	P VALUES	0.040424	0.070975	0.107347	0.660549	0.541853	0.189202	0.769698	0.882374	0.69627	0.607921	0.76967	0.204559	0.42058	0.558136	0.479185	0.0232533	0.509859	0.0263514	0.187628	0.807227	0.883503	0.204391	0.464104	0.112599	0.0146852	0.035866	0.0538999	0.69627	0.696235	0.78826	0.751087	0.807204	0.922248	0.222284	0.76967	0.525811	0.464214	0.096945	0.305448	0.525862	0.558185	0.187628	0.0218107	0.353753	0.107347	0.393037	0.204559	0.558088
[truncated: 75 more columns]

## Sheet: POST
Patient ID	PNEUMONITIS_0vsOther	CD14_NK1POST	CD14-_NK1POST	CD3+_NK1POST	CD3+/CD56+CD16+_NK1POST	CD3+/CD56+CD16-_NK1POST	CD3+/CD56+CD107a+_NK1POST	CD3+/CD56+CD107a-_NK1POST	CD3+/CD56+CTLA4+_NK1POST	CD3+/CD56+CTLA4-_NK1POST	CD3+/CD56+NKp44+_NK1POST	CD3+/CD56+NKp44-_NK1POST	CD3+/CD56-CD16+_NK1POST	CD3+/CD56-CD107a+_NK1POST	CD3+/CD56-CTLA4+_NK1POST	CD3+/CD56-NKp44+_NK1POST	NKcells_NK1POST	NKcells/CD56+CD16+_NK1POST	NKcells/CD56+CD16-_NK1POST	NKcells/CD56+CD107a+_NK1POST	NKcells/CD56+CD107a-_NK1POST	NKcells/CD56+CTLA4+_NK1POST	NKcells/CD56+CTLA4-_NK1POST	NKcells/CD56+NKp44+_NK1POST	NKcells/CD56+NKp44-_NK1POST	CD14_NK2POST	CD14-_NK2POST	CD3+_NK2POST	CD3+/CD56+CD16+_NK2POST	CD3+/CD56+CD16-_NK2POST	CD3+/CD56+CD69+_NK2POST	CD3+/CD56+CD69-_NK2POST	CD3+/CD56+NKG2D+_NK2POST	CD3+/CD56+NKG2D-_NK2POST	CD3+/CD56+PD1+_NK2POST	CD3+/CD56+PD1-_NK2POST	CD3+/CD56-CD16+_NK2POST	CD3+/CD56-CD69+_NK2POST	CD3+/CD56-NKG2D+_NK2POST	CD3+/CD56-PD1+_NK2POST	CD3+/NKG2D+PD1+_NK2POST	CD3+/NKG2D+PD1-_NK2POST	CD3+/NKG2D-PD1+_NK2POST	NKcells_NK2POST	NKcells/CD56+CD16+_NK2POST	NKcells/CD56+CD16-_NK2POST	NKcells/CD56+CD69+_NK2POST	NKcells/CD56+CD69-_NK2POST	NKcells/CD56+NKG2D+_NK2POST
1	0
2	0
3	1
6	0
7	0
9	1
11	0
12	0
13	0
14	0
15	1
16	0
17	1
18	0
19	0
20	1	27.4	45.8	24.5	4.34	0.36	0.045	4.96	0.03	4.32	0.045	4.35	60.3	2.29	1.65	2.08	4.74	91.6	0.78	1.02	86.8	0.39	73.9	3.06	72.4	27.3	44.8	25	5.21	0.17	0.15	5.56	5.78	0.093	0.046	4.6	70.5	3.19	39.2	2	1.49	32.7	0.46	4.34	89.9	0.45	14.9	78	79.9
21	0	32.6	45.7	54.4	2.96	0.91	0.003	4.28	0.00899	3.46	0.012	3.19	57	0.051	0.11	0.075	1.13	96.1	0.86	0.14	89.4	0.29	74.5	1.01	78.4	31.6	45.3	55.6	3.74	0.19	0.069	4.14	3.53	0.48	0.0099	3.01	80.4	0.59	25	0.056	0.017	20	0.043	1.17	96.9	0.31	6.76	88.8	82.4
22	0	14.4	57.6	44.4	0.39	0.17	0.00346	0.62	0	0.5	0.029	0.45	41.7	0.054	0.092	0.16	4.57	96.7	1.68	0.067	92.5	0.067	75.7	3.79	78.2	14.8	58	45.9	0.41	0.22	0.083	0.59	0.48	0.15	0.033	0.47	43.3	1.31	19.1	0.15	0.075	13.1	0.088	4.1	96.9	1.94	25.1	74.2	75.4
23	0	24.6	48.8	33.5	2.38	0.33	0.081	2.79	0.049	2.17	0.049	1.99	60.1	1.16	0.67	0.91	11.7	94	0.98	0.56	87.1	0.37	68.4	0.37	69.6	26.4	50.1	34.9	2.74	0.23	0.081	2.95	3.1	0.12	0.027	2.58	63.7	1.28	24.6	0.85	0.65	19.5	0.16	9.55	96.1	0.84	6.65	86.2	93.1
24	0	25.9	50.1	51.3	7.4	1.43	0.036	9.87	0.046	8.08	0.041	7.97	61.7	0.27	0.29	0.32	3	90.4	1.32	0.79	84.4	0.53	70.7	1.32	71.3	24.3	51.2	51.5	7.64	1.34	2.34	7.8	8.8	0.99	0.29	8.53	66	4.21	49.7	2.88	1.66	43.3	1.15	2.19	88.5	1.82	7.41	80.6	91.4
26	0	21.8	65.5	62	2.62	0.22	0.017	3.6	0.012	2.77	0.029	2.71	70.9	0.095	0.16	0.075	2.37	85	0.22	2.17	94.3	0.87	75	1.2	77.2	21.2	64.8	57.9	3.53	0.31	0.78	3.49	3.44	0.56	0.085	3.26	74	3.7	28.6	1.11	0.64	22	0.43	1.98	90.8	1.05	17.8	76.6	89.5
27	1	19.3	51.9	28.3	4.33	0.14	0	4.98	0	4.33	0	4.48	56.9	0.11	0.036	0.036	3.39	89.5	0	0	89.5	0	75.4	0.3	73.4	14.3	55.3	27.7	3.99	0.12	0.28	4.27	4.53	0.21	0.069	3.67	68.2	2.31	20.1	0.25	0.21	17.5	0.092	2.22	94.8	0	23.9	74.6	90.2
28	0	11.8	61.5	45.4	1.05	0.009	0	1.35	0	1.14	0.39	0.94	81	0.12	0.16	0.17	0.8	90.3	0.51	0.51	92.3	1.02	77	6.12	80.1	13.8	65.7	52.4	1.21	0.01	0.43	1.09	0.67	0.66	0.37	1.07	86	2.26	26.5	0.42	0.51	19.7	0.23	0.63	82.9	1.28	5.56	85.9	90.2
29	1	49.1	39.4	47.4	4.18	0	0	5.1	0.035	4.27	0.035	4.77	73.5	0.069	0.12	0.069	5.66	78.7	0.14	0.29	86.4	0.29	69.3	0.29	81.2	44.9	42.4	43.9	3.55	0	0.1	4.35	3.68	1.39	0.033	4.18	72	2.32	23.2	0.86	0.63	19.2	0.3	4.62	82.3	0.95	15.1	76.7	80.4
30	0
31	0
32	1	26	55.1	37.2	1.87	1.02	0.033	3.1	0.00364	2.36	0.00364	2.29	36.3	1.27	0.098	0.04	5.47	93.8	3.86	2.38	94.9	0.15	74.4	0.099	76.7	23	59.3	37.5	0.24	2.13	0.57	2.34	2.49	0.29	0	2.31	1.65	2.73	20.4	0.066	0.011	17.5	0.05	4.6	90.6	8.4	36.9	64	87.1
33	0	30.9	62.6	60.4	1.72	0.99	0.00663	2.95	0.00796	2.31	0.021	2.06	41.2	0.078	0.18	0.22	6.03	94	1.9	0.32	89.9	0.35	75	1.4	70.4	31.2	59.4	58.5	1.05	1.73	1.33	1.88	1.5	1.38	0.034	2.16	29.5	7.45	23.7	0.42	0.22	17.6	0.2	4.44	94.2	4.53	34.3	63.4	67.2
34	0	10.8	71.2	64.3	9.79	1.9	0.00427	13.1	0.021	10.7	0.012	9.75	61.6	0.042	0.12	0.074	1.25	92.1	4.07	0.33	93.1	0.66	74.9	0.93	75.9	11	70.2	63.5	11.7	1.05	0.55	13.2	5.98	7.14	0.018	10.4	70.2	1.15	25.9	0.058	0.032	22.6	0.038	1.14	93.8	2.72	13.7	84.8	76.1
35	1	29.8	56.2	52.4	4.98	1.43	0.00882	6.55	0.00588	5.21	0.015	5.04	60.7	0.044	0.12	0.1	11.3	95.9	1.64	0.13	89.4	0.16	71.6	1.19	73.6	32.6	54.5	52.3	3.85	3.02	0.54	6.32	3.79	2.92	0.016	5.21	42.4	1.56	21	0.056	0.018	16.8	0.039	11.2	93.7	4.88	15.7	78.4	29.4
36	1	16	62.6	53.1	16.4	13.8	0.00539	29.6	0.02	24.5	0.082	23.2	24.2	0.031	0.044	0.11	8.21	95.9	3.19	0.23	90.5	0.14	73	0.17	72.9	15.7	64.9	54.9	24.3	7.45	0.75	29.7	12.6	17.5	0.1	24.2	36.8	1.04	14.9	0.13	0.098	19.9	0.11	7.79	96.7	1.89	10.4	84.7	33.8
37	0	30.1	55.3	50	0.56	0.55	0.0031	1.32	0.00155	0.96	0.012	0.92	30.3	0.036	0.053	0.076	3.85	94.1	4.82	0.1	90.6	0.18	73.9	0.44	72.4	30.1	56	49.7	0.66	0.54	0.64	0.78	0.45	0.7	0.00758	0.93	39.2	2.51	16.5	0.097	0.024	11.3	0.064	3.84	94.1	4.92	28.9	69	49
38	0	29.8	53	60.1	3.6	4.82	0.000652	8.26	0.00326	6.77	0.00848	6.04	30	0.028	0.064	0.063	2.68	97.4	1.39	0.22	87.8	0.12	69.8	0.25	72.2	29.2	55.3	59.7	4.5	4.37	0.41	7.76	2.35	5.01	0.021	6.54	34.8	1.11	20.1	0.12	0.022	15.1	0.084	2.68	97.8	1.14	8.19	82.4	76.6
39	0	10.8	75.9	60.4	0.64	0.75	0	1.48	0.00129	1.18	0.00644	1.08	27.8	0.035	0.11	0.12	1.2	95.3	3.05	0.45	92.4	0.45	74.3	0.58	69.7	8.68	77.3	60.5	0.68	0.61	0.13	1.19	0.61	0.64	0.02	1.03	29.8	0.87	16.1	0.15	0.047	12	0.091	1.11	95.1	3.31	65.4	35.5	35.7
40	0	29	55.9	60.6	11.8	19.6	0.00342	30.6	0.00752	25.2	0.024	22.7	18.9	0.017	0.029	0.039	2.53	93.4	5.73	0.066	91.5	0.016	72.6	0.13	77.1	26.9	58.6	59.8	16.2	15.6	0.26	29.4	6.79	19.6	0.087	22.8	24.4	0.65	22.2	0.052	0.037	20.3	0.085	2.11	93	5.77	4.11	86.7	87.9
42	0	11.5	66.2	39	6.12	2.37	0.00268	9.08	0.00535	7.28	0.013	7.05	44.8	0.025	0.079	0.082	3.39	93.3	2.46	0.15	93.8	0.12	73.8	0.32	72.9	11.5	65.9	39.8	6.5	1.92	0.77	8.11	3.56	5.04	0.013	6.9	49.5	1.21	19.6	0.069	0.026	16.7	0.049	3	93	2.95	17.3	79.7	40.9
43	0	10.3	68.7	45.5	3.62	1.34	0	5.38	0.00635	4.24	0.00847	4.04	59.6	0.018	0.054	0.043	3.55	92.7	4.17	0.2	92.7	0.29	74.8	10	71.2	10.1	69.2	44.7	3.95	1.35	0.21	5.23	3.93	1.36	0.01	4.03	60	0.9	32.4	0.027	0.024	25	0.00901	3.38	92.1	5.67	4.21	89.7	47
44	0	33.5	55.8	55.2	16.1	1.18	0.00767	18	0.017	14.5	0.046	14.1	50.5	0.061	0.073	0.082	7.25	94.5	2.35	0.22	91.2	0.14	72.8	0.15	73.1	33.9	55.3	54.5	16.7	0.92	1.01	16.8	7.74	10	0.041	13.7	56.5	1.25	13.9	0.057	0.038	15.8	0.048	7.15	94.7	2.52	14.7	81.3	39.2
45	1	28.6	51.2	27.2	2.16	1.39	0.00895	3.77	0	3	0.00895	2.86	48	0.11	0.11	0.057	17.3	97.4	0.81	0.15	89.4	0.12	68.7	0.075	71.4	27.4	54.2	26.8	2.51	1.41	1.15	2.91	0.96	2.8	0.00849	3.05	51.6	12.4	9.08	0.068	0.023	7.22	0.042	17.5	97.6	0.92	15.5	79.7	27.5
46	0	36	50.6	42.1	0.79	0.23	0	1.12	0.00393	0.92	0.016	0.89	52.2	0.13	0.16	0.09	3.1	90.3	3.95	0.53	91.9	0.16	71.9	9.88	74.1	35.7	51.1	43.3	0.92	0.2	0.21	1	0.69	0.43	0.00781	0.92	60.9	0.86	15.6	0.043	0.00781	11.4	0.031	3.28	90.6	3.71	24.9	72.9	51.3
47	0	29.8	59.1	50.9	13.2	4.18	0	17.6	0.00529	14.4	0.00794	13.4	43.3	0.019	0.019	0.021	2.93	88.4	5.48	0.046	88.8	0.092	73.2	0.32	79	30.6	57.5	50.4	15.5	3.06	0.7	17.5	13	6.07	0.11	14.3	52.3	0.71	9.82	0.36	0.16	16.6	0.26	2.54	91.8	4.15	24.8	72.1	60.6
48	1	37.8	50.9	40.3	2.83	2.84	0.00176	5.86	0	4.85	0.00706	4.5	33.9	0.028	0.065	0.067	17.1	96.7	0.98	0.25	89.1	0.16	75.1	0.17	76.4	36.7	52.9	39.8	2.76	2.83	1.72	4.36	2.79	2.73	0.076	4.42	34.7	2.87	25	0.63	0.3	19.4	0.33	16.2	97.3	1.15	49.2	51.4	50.7
49	0	23.8	57.8	50.3	2.28	2.62	0.00527	5.1	0.00703	3.93	0.016	3.73	35.5	0.046	0.11	0.079	5.57	95.8	2.83	0.14	93.4	0.11	72.8	0.3	73.6	23.8	59.1	51.4	2.61	2.57	0.71	4.52	4.34	0.85	0.031	3.75	39.4	1.45	30.5	0.2	0.085	23.3	0.13	5.36	95.7	3.17	7.31	84.9	85.6
50	0	23.4	66.4	68.2	16.5	7.12	0.022	23.6	0.00734	19.5	0.27	19.7	42.5	0.11	0.04	0.093	1.33	93.5	3.38	0.83	90.3	0.38	72.7	9.53	72.5	22.5	68.5	69.3	19.8	4.92	0.49	23	8.09	16.3	0.29	18.4	48.5	1.01	10.9	0.55	0.27	13.5	0.51	1.38	92.3	3.82	5.94	82.4	39.8
51	0	44.4	46.4	52.2	19.6	6.09	0.031	25.6	0.021	21.6	0.00715	18.7	46.6	0.1	0.11	0.036	5.88	94.4	2.01	0.38	88.1	0.13	71.7	0.17	69.2	43.6	47.6	54.2	19.5	6.11	0.43	24.2	14.4	11.6	0.17	18.6	39.5	1.31	20.9	0.27	0.19	23.8	0.23	5.01	93.6	2.9	38.2	60.4	39.4
52	0	26.7	59.3	52	3.48	1.46	0.00713	5.29	0.00571	4.17	0.00713	3.89	44.1	0.12	0.13	0.15	1.34	90.7	7.48	0.5	87.6	0.22	68.6	0.17	69.8	25.8	61.1	53	3.58	1.72	0.48	5	2.57	2.55	0.027	4.05	41.7	1.66	24.6	0.45	0.21	19.6	0.23	1.27	90	8.37	32.6	67.1	39.3
	P VALUES	0.379	0.06	0.013	0.696	0.608	0.589	0.903	0.557	0.591	0.464	0.558	0.77	0.366	0.807	0.421	0.004	0.591	0.034	0.903	0.204	0.366	0.942	0.06	0.393	0.329	0.079	0.006	0.845	0.884	0.626	1	0.733	0.661	0.714	0.696	0.807	0.022	0.696	0.643	0.864	0.845	0.807	0.005	0.788	0.13	0.306	0.294	0.51
[truncated: 84 more columns]

## Sheet: POST-PRE
Patient ID	PNEUMONITIS_0vsOther	CD14_NK1_DIF	CD14-_NK1_DIF	CD3+_NK1_DIF	CD3+/CD56+CD16+_NK1_DIF	CD3+/CD56+CD16-_NK1_DIF	CD3+/CD56+CD107a+_NK1_DIF	CD3+/CD56+CD107a-_NK1_DIF	CD3+/CD56+CTLA4+_NK1_DIF	CD3+/CD56+CTLA4-_NK1_DIF	CD3+/CD56+NKp44+_NK1_DIF	CD3+/CD56+NKp44-_NK1_DIF	CD3+/CD56-CD16+_NK1_DIF	CD3+/CD56-CD107a+_NK1_DIF	CD3+/CD56-CTLA4+_NK1_DIF	CD3+/CD56-NKp44+_NK1_DIF	NKcells_NK1_DIF	NKcells/CD56+CD16+_NK1_DIF	NKcells/CD56+CD16-_NK1_DIF	NKcells/CD56+CD107a+_NK1_DIF	NKcells/CD56+CD107a-_NK1_DIF	NKcells/CD56+CTLA4+_NK1_DIF	NKcells/CD56+CTLA4-_NK1_DIF	NKcells/CD56+NKp44+_NK1_DIF	NKcells/CD56+NKp44-_NK1_DIF	CD14_NK2_DIF	CD14-_NK2_DIF	CD3+_NK2_DIF	CD3+/CD56+CD16+_NK2_DIF	CD3+/CD56+CD16-_NK2_DIF	CD3+/CD56+CD69+_NK2_DIF	CD3+/CD56+CD69-_NK2_DIF	CD3+/CD56+NKG2D+_NK2_DIF	CD3+/CD56+NKG2D-_NK2_DIF	CD3+/CD56+PD1+_NK2_DIF	CD3+/CD56+PD1-_NK2_DIF	CD3+/CD56-CD16+_NK2_DIF	CD3+/CD56-CD69+_NK2_DIF	CD3+/CD56-NKG2D+_NK2_DIF	CD3+/CD56-PD1+_NK2_DIF	CD3+/NKG2D+PD1+_NK2_DIF	CD3+/NKG2D+PD1-_NK2_DIF	CD3+/NKG2D-PD1+_NK2_DIF	NKcells_NK2_DIF	NKcells/CD56+CD16+_NK2_DIF	NKcells/CD56+CD16-_NK2_DIF	NKcells/CD56+CD69+_NK2_DIF	NKcells/CD56+CD69-_NK2_DIF	NKcells/CD56+NKG2D+_NK2_DIF
1	0
2	0
3	1
6	0
7	0
9	1
11	0
12	0
13	0
14	0
15	1
16	0
17	1
18	0
19	0
20	1	-14.6	7.8	-15.3	2.81	0.22	0.045	3.02	0.03	2.75	0.045	2.91	-11.5	1.62	1.21	1.64	2.96	3	-0.77	-1.05	-4.9	0.39	-6.4	-1.09	-8.9	-15.3	6	-12.7	3.53	-0.07	0.04	3.51	3.89	-0.017	0.002	2.95	6	0.03	9.3	1.19	1.01	8.6	0.09	2.8	-2.1	-1.15	-3.2	-1.3	11.3
21	0	-4	7.8	4.5	1.04	0.8	0.003	1.66	-0.00201	1.34	-0.02	0.97	-4	-0.749	-0.51	-0.455	-0.1	14.5	-2.65	-1.18	8.3	-0.59	5.2	-0.31	6.9	-4.3	5.7	7.4	1.09	0.05	-0.291	1.34	0.37	0.28	-0.1501	0.81	16.1	-3.8	-15.1	-6.234	-2.983	-7.1	-2.627	0.22	11.1	-1.88	-19.44	19.9	-10.5
22	0	-13.7	9.9	17.6	-1.16	-0.04	-0.00854	-1.06	-0.085	-1.03	-0.861	-0.43	-9	-1.236	-0.798	-1.22	-8.83	2.5	1.14	-0.253	6.6	-0.863	2.7	-2.26	3.1	-11.2	8.1	17.7	-1.28	0.08	-0.087	-1.04	-1.31	0	-0.807	-0.69	-17.4	-1.09	-5.2	-6.79	-3.545	-4.6	-3.012	-6.7	4.4	1.37	16.77	-7.2	-20.7
23	0	-2.8	0.4	-5.6	1.07	-0.11	0.07475	0.98	0.04275	0.63	0.04275	0.43	17.3	1.03	0.589	0.67	-0.7	1	-0.32	0.16	-3.9	0.17	-6	0.07	-10.8	0.4	-0.1	-3.8	1.13	-0.05	-0.069	1.04	1.59	-0.42	0.004	0.92	13.7	0.54	2.4	0.64	0.586	2	0.03	-1.85	3.1	-0.36	-66.25	58.7	24.4
24	0	-4.6	-4.8	0.5	2.3	1.2	0.0277	3.51	0.029	3.14	0.0327	2.85	-16.1	-0.1	-0.02	-0.24	0.49	3.7	1.15	-3.75	-1.8	-1.15	-3.2	-3.05	2.2	-5.3	-2.7	2.6	2.21	1.279	1.4	2.21	3.85	-0.17	-0.15	3.48	-16.6	1.26	7.3	-12.42	-5.55	11.1	-5.61	0.02	4.4	1	1.37	-4.3	21.9
26	0	-15.2	14.3	13.5	-2.71	-1.32	0.006	-3.72	0.00656	-2.92	-0.009	-3.01	20.9	-0.035	0.073	-0.235	-4.17	-7.2	-0.63	0.8	4.7	0.71	5.3	-0.53	-3.8	-17.8	15.5	9.4	-3.38	-0.39	0.29	-3.64	-3.23	-0.4	-0.705	-2.41	7.7	2.7	1.2	-15.59	-5.47	-0.8	-7.58	-3.66	-3.3	0.67	9.86	-5.9	0.9
27	1	-32.8	20.2	-11.9	-3.1	-0.04	-0.048	-3.17	-0.048	-2.84	-0.064	-2.15	-16.2	-0.21	-0.464	-0.264	-5.9	1.7	-0.069	-2.35	1.8	-1.31	0.3	-4.26	2	-39.4	11.7	-19.4	-10.51	-1.91	-0.42	-13.33	-4.91	-6.35	-0.631	-10.73	4.5	1.06	3.9	-2.32	-1.66	-0.8	-0.928	-13.68	12.1	-0.93	8.6	-2.1	27.1
28	0	-2	5.8	8	0.17	-0.091	0	0.2	0	0.18	0.27	0.06	5.9	-1.03	-0.54	-0.42	-0.53	0.7	-1.8	-1.22	-0.2	-0.14	0.1	2.07	8.4	0.9	9.3	16.9	0.29	-0.061	0.31	-0.05	-0.22	0.43	0.21	0.11	5.9	-1.21	-5.6	-4.01	-1.32	-4.5	-1.94	-0.65	-2.2	0.78	-1.37	-2.2	1.6
29	1	24.7	-14.2	7.5	0.44	-0.2	-0.00925	0.62	0.02575	0.5	0.02575	0.88	7.8	-0.391	-0.27	-0.341	0.91	-8.4	-0.71	-0.49	-0.6	0.06	-3.1	-1.03	5.1	17.7	-12.5	7.5	0.58	-0.091	-0.02	0.96	0.8	0.49	-0.087	1.36	4.7	0.39	4.8	-6.18	-3.13	6.1	-2.36	0.1	-4.1	-0.21	8.69	-11.3	-1
30	0
31	0
32	1	-10	3.6	0.1	-0.7	0.63	-0.627	0.34	0.00364	-0.53	-0.02436	-0.13	-10.4	-22.83	-0.392	-0.67	-9.03	-1.1	2.68	-42.82	37.8	-0.5	-9.4	-0.691	-3.8	-16.1	9.5	1.6	-2.27	1.17	-0.93	-0.11	-0.31	-0.47	-0.14	-0.8	-41.55	-20.37	1.6	-7.334	-2.029	1.1	-4.41	-8.2	-4.8	6.6	-34.8	34.4	10.2
33	0	19.5	-9.7	22.2	-0.33	0.14	0.00663	-0.47	-0.29204	-0.19	-0.109	-0.25	-7.7	-0.122	-4.51	-3.26	1.72	9.9	-5.36	-2.47	4.3	-10.85	9.5	-14.4	18.9	20.8	-6.6	18.4	-1.38	1.26	-0.76	0.22	-0.21	0.29	-0.466	-0.1	-30.2	-11.05	-12.7	-7.69	-4.4	-5.1	-2.79	1.75	17.6	0.42	-35.9	36.4	2.2
34	0	-27.6	32.6	11.6	3.82	1.21	0.00427	5.16	0.021	3.56	0.012	2.8	0.7	-0.047	0.046	-0.015	0.36	10.2	1.87	-0.55	7.2	-0.22	1.3	-1.71	5.9	-24.5	27	9.1	3.67	-0.01	0.13	4.04	-1.84	5.3	-0.382	2.68	10.3	-1.68	1.6	-3.242	-1.678	-0.3	-1.542	0.37	0.8	-0.1	1.7	1	-19.7
35	1	-13.6	12.4	7.2	-3.3	0.14	-0.00118	-3.41	-0.01012	-2.58	-0.006	-2.96	-4.3	-0.116	-0.12	0.038	-4.9	0.7	1.38	-0.15	-2.4	-0.01	-2.6	-0.1	-9.3	-11.8	10.7	6.6	-5.17	2.13	0.23	-3.49	-5.21	1.64	-0.026	-3.25	-27.4	0.25	-12.3	-1.094	-0.262	-15.5	-0.651	-3.6	-1.4	4.53	9.81	-10.3	-46.9
36	1	-10.1	5.5	-4.7	-3.7	-3.6	-0.01161	-6.9	-0.028	-5.6	-0.068	-4.8	2.3	0.006	-0.014	-0.06	-1.75	-1.4	2.01	0.09	1	-0.05	0.1	-0.28	2.1	-9.5	5.8	-3.2	-2	-5.25	-0.6	-6	-10.8	3.6	-0.11	-5.9	6.9	-0.22	-3.8	-0.7	-0.342	-11.5	-0.35	-1.72	-0.6	0.81	3.86	-1.6	-26.3
37	0	0.8	1.9	4	0.2	0.35	0.0031	0.59	0.00155	0.38	0.00422	0.45	-40.3	-0.074	-0.197	-0.094	2.27	1.1	2.33	-0.13	3.5	-0.95	2.9	-0.46	4.5	1.8	0.9	3.7	0.27	0.27	0.17	0.42	0.25	0.25	-0.01842	0.32	-31.7	0.85	1.8	-0.353	-0.156	-0.2	-0.176	2.25	2	0.97	12.9	-7.5	-10
38	0	4.6	-2.3	2.4	-2.73	2.17	-0.005288	-0.9	-0.00506	-0.79	0.00373	-1.04	-21.2	-0.015	-0.003	-0.014	-1.12	5.2	0.89	0.11	-2.7	-0.02	-4.4	0.03	-2.2	3.6	-2.5	1.2	-2.34	1.47	0.06	-1.59	0.08	-1.06	-3.779	0.47	-15.2	0.19	-1.4	-7.17	-1.778	-1.7	-6.766	-1.24	4.1	0.33	2.8	-6.2	4.7
39	0	1.55	-0.2	3.9	-0.59	-0.12	0	-0.73	-0.00124	-0.62	-0.00656	-0.62	-7.2	0	-0.04	0.01	-1.44	2.7	-1.23	0.07	1.3	0.12	-1.9	-0.12	-2	0.1	0	2.4	-0.67	-0.18	-0.11	-0.76	-0.81	-0.07	-0.005	-0.72	-9.2	-2.53	-4.1	-1.47	-0.263	-3.7	-0.949	-1.37	4.1	-1.7	-19.8	20.7	-20.8
40	0	8.1	-9.4	-2.9	-0.4	6.1	-0.00016	5.1	0.00215	3.9	-0.01	3.9	-2.6	-0.03	-0.003	-0.008	0.75	1.8	-1.92	-0.064	-3.7	0.016	-5.9	0	-1.6	5.8	-7.2	-3.6	0.6	5	0.07	4.2	0.12	4	-5.993	3.8	-3.5	-0.03	-1	-2.758	-1.313	-1.9	-5.825	0.63	1.8	-2.42	1.54	-5.7	-5
42	0	-4.8	5	14.6	1.08	1.74	0.00268	2.95	0.00535	2.25	-0.029	2.18	-17.8	-0.027	-0.021	-0.078	2.72	1.7	-0.61	-0.04	0.7	-0.07	-2.1	-5.81	1.6	-3.6	1.6	13.8	1.51	0.99	0.35	2.33	-1.07	3.6	-0.147	1.59	-8.5	-2.89	-5.2	-1.551	-0.614	-6.3	-0.781	2.44	7.4	-2.67	-6.5	8.7	-21.1
43	0	-11.2	2.9	-7.5	0.29	0.81	-0.00189	0.94	0.00635	0.68	-0.00097	0.71	-2.8	-0.016	-0.005	0.015	-0.83	-1.8	1.77	0.154	0.5	-0.03	-1.6	8.77	-4.5	-12.1	5.3	-8.4	0.06	0.89	0.1	0.67	0.96	-0.08	0.00684	0.57	-7.2	-0.58	-0.7	-0.313	-0.027	-1.4	-0.23099	-0.62	-2.1	2.84	-14.99	11.8	17.8
44	0	-0.3	0.7	4.7	5.6	0.71	-0.00833	5.2	0.001	4.2	0.006	4.26	-20.7	-0.018	-0.107	-0.013	-0.61	2.8	1.54	-0.24	-2.7	0.04	-3.5	-0.1	-0.5	-1.4	1.6	3.9	2.6	0.3	-0.43	1.7	-2.96	4.9	-0.069	0.8	-13.9	-3.84	-12.5	-1.183	-0.352	-13.4	-0.752	-0.57	1.1	1.02	-3.4	1	-21.4
45	1	0.4	-3.1	-8.4	-0.21	-0.06	-0.00305	-0.31	-0.012	-0.09	0.00895	-0.25	-9.1	0.052	-0.05	-0.001	0.9	2.4	-0.32	-0.4	-2.9	-0.23	-3.4	-0.105	-5.3	-1.6	1.1	-9.2	-0.51	0.41	0.52	-0.66	-0.38	0.19	-0.00095	-0.21	-16	8.53	-2.72	-0.322	-0.107	-3.18	-0.178	2.7	3.1	0.12	1.1	-2.9	-18.8
46	0	20.7	-17.3	-5.2	-0.2	0.08	-0.013	-0.31	-0.0003	-0.18	0.01177	-0.2	-12.7	-0.14	-0.11	-0.12	-5.03	0.5	2.87	-0.31	-1.6	-0.01	-0.2	9.51	-0.2	21.3	-17.8	-4.3	-0.12	0.09	0.1	-0.25	-0.2	0.1	0.00282	-0.04	-9.4	-0.37	-6.5	-0.177	-0.05719	-5.9	-0.079	-4.4	1.7	2.5	2.7	-5.5	-15
47	0	-15.6	12.4	-0.4	2.6	-0.7	-0.013	1.6	-0.00112	1.6	0.00153	2	2.6	-0.039	-0.121	-0.043	-0.74	-3.6	3.06	-0.404	-4.8	0.092	-1.3	0.23	3.9	-11.6	7.3	-0.5	3.1	0.15	-0.11	2.5	-1.9	4.88	-2.19	4	2.2	-0.04	-5.18	-17.54	-6.44	-0.8	-9.67	-0.41	1.1	2.08	13.1	-13.5	-25.4
48	1	4.3	-6.2	-8.5	1.14	2.47	0.00176	3.55	0	3	0.00706	2.65	-42.1	-0.032	0.012	-0.063	14.49	9.4	-1.02	-1.5	-3.8	-0.46	-1.5	-3.2	5.2	5.5	-0.9	6.4	1.06	2.41	1.39	2.45	1.62	1.8	-0.384	2.89	-42.5	0.02	2.1	-13.37	-4.73	4.2	-7.29	14.37	7.1	-2.4	35.6	-33.6	5.2
49	0	0.6	-0.8	4.7	0.32	1.63	-0.00032	1.82	-0.01197	1.35	0.003	1.32	-8	-0.019	-0.06	-0.061	-2.54	0.6	0.63	-0.2	-1.5	-0.35	-0.4	-0.05	2.8	-3	2.1	8.4	0.13	1.15	0.04	0.88	1.75	-0.63	-0.239	0.27	-6.8	-0.71	4.3	-8.52	-2.975	1.7	-4.49	-3.36	1.6	-0.08	-23.99	16.3	15.1
50	0	4	0.3	3.3	-0.3	2.62	-0.027	1.9	-0.01766	1.5	0.254	1.8	-7.6	-0.04	-0.06	0.049	-0.64	0.7	0.61	0.11	5.4	0.22	3.4	8.43	-1.1	3.7	-2.3	4	3.1	-0.81	0.23	1.3	-5.51	6.48	-1.59	1.2	3.3	0.1	-10.8	-16.55	-5.74	-10.2	-9.99	-0.4	-2.4	0.89	1.13	-3.7	-13.6
51	0	8.3	-8.4	0.3	5.9	-0.84	-0.005	5.2	-0.003	4.2	-0.01185	3.5	8.4	-0.01	0.047	-0.017	0.62	-0.3	0.15	-0.31	0.3	0.01	-1	0.091	-0.2	6.9	-7.7	2.3	3.8	1.14	-0.36	5	3.8	1.3	-0.45	4.4	-3.8	-0.45	-0.5	-13.23	-3.9	4.6	-7.67	0.17	-1.4	1.37	-34.7	33.2	-0.8
52	0	5.6	-7.2	-7.5	0.28	1.03	0.00424	1.1	0.00065	0.81	0.00207	0.62	-19.8	0.048	0.04	0.107	0.09	1.4	4.55	-0.19	1	-0.06	-3.3	-0.28	-4.3	3.9	-5.7	-3.2	-0.19	1.17	0.11	0.63	0.7	0.17	-1.273	1.11	-20.7	0.07	0.3	-30.45	-10.89	7	-17.37	0.11	-2.7	4.5	-28.2	28.8	6.4
	P VALUES	0.329	0.558	0.032	0.188	0.283	0.13	0.164	0.678	0.118	0.884	0.196	0.558	0.922	0.77	1	0.961	0.542	0.826	0.071	0.367	0.678	0.124	0.079	0.341	0.188	0.222	0.113	0.107	0.643	0.696	0.172	0.591	0.788	0.262	0.13	0.591	0.143	0.102	0.205	0.262	0.558	0.143	1	0.42	0.661	0.172	0.242	0.845
[truncated: 84 more columns]
