# Supplementary material
Source: HighWire-hosted journal article supplement (https://jitc.bmj.com/content/9/8/e002804)
Supplement: inline-supplementary-material-5 [file inline-supplementary-material-5.xlsx]

## Sheet: PRE
Patient ID	PNEUMONITIS_0vsOther	4-1BB	6Ckine	Activin A	AgRP	ALCAM	ANG	ANG-1	Angiostatin	AR	Axl	B7-1	BCMA	BDNF	bFGF	BLC	BMP-4	BMP-5	BMP-7	b-NGF	BTC	CathepsinS	CCL28	CD 40	CD14	CD30	CD40L	CEACAM-1	Contactin-2	PDGF1 (Cripto-1)	CTACK	CXCL16	DAN	DKK-1	DR6	Dtk	E-Cadherin	EGF	EGF R	EG-VEGF	ENA-78	Endoglin	Eotaxin	Eotaxin-2	Eotaxin-3	EpCAM	ErbB3	E-Selectin	Fas
1	0
2	0
3	1
6	0
7	0
9	1
11	0
12	0
13	0
14	0
15	1
16	0
17	1
18	0
19	0
20	1	2979.43	1016.02	1822.2	2519.05	13823.1	98194.1	33960	12691.2	5396.85	931.204	1881.63	15849.2	81612.4	3203.77	1792.58	5657.78	4718.25	3754.91	2066.17	769.849	23225.4	1193.96	1044.4	32124	2279.95	3923.93	6223.13	3632.57	739.273	9950.58	23016.2	450.467	1813.42	46376.3	2770.7	830.145	21382.3	101190	9443.06	1297.84	3231.03	5471.04	10268	737.555	900.809	4324.32	4166.08	3231.03
21	0	376.064	429.783	1049.07	2132.93	5980.28	91463.7	45600.8	10237.2	1489.99	110.037	1025.07	14603.7	66927.5	218.023	13018.5	2407.15	5161.51	2610.7	2467.85	403.311	30636.5	920.247	474.557	27682.4	1190	7413.3	3384.45	1288.31	129.094	26485.3	23318.2	199.417	563.926	53870.5	1444.06	315.283	28281.4	91016.8	2975.97	813.2	3568.27	5615.74	2957.55	13.6351	972.22	1651.84	2445.36	1058.06
22	0	1288.09	536.009	637.016	1349.24	8762.97	89947.1	28276.9	14125	1568.41	419.925	2471.46	14664.3	20268.1	688.122	1395.1	1048.51	1848.31	1082.39	1353.82	378.611	20785.2	973.555	548.308	19659.9	947.101	4387.36	4813.2	3129.48	719.076	8353.97	24113.6	268.234	630.164	60966.7	1537.53	582.121	13688.2	100115	1607.57	515.649	7293.29	3496.26	9041.6	10.001	580.053	5239.72	2301.08	1308.77
23	0	1086.3	390.655	2540.96	5122.34	11030.7	91138.2	23560	10771.9	3784.54	395.475	2307.95	13262.1	13165.1	326.925	4788.98	2569.05	5557.6	6492.52	2584.46	438.971	29952.2	859.809	1113.6	29257.4	2161.28	2568.03	4742.59	3158.42	7077.54	11866.7	21760.1	629.173	829.223	52953.6	2666.08	584.259	12747.4	64504.1	6548.37	292.647	3495.53	8535.85	10580.6	136.798	902.161	5643.53	3600.4	2169.02
24	0	8646.9	470.83	988.765	1257.83	8483.02	82310.8	14017.6	15360.6	2664.94	2201.97	2903.91	22312.3	31389	840.495	11281.4	1450.64	3007.8	1508	4997.13	566.94	30296.4	4933.89	736.302	20878.1	989.51	2133.76	6726.93	2100.12	1734.76	13450.6	30363.1	294.157	781.752	49388.4	2935.55	619.463	13192.7	92168.9	7752.21	1469.97	4236.55	5460.49	4260.45	114.605	417.419	2478.9	3059.66	627.217
26	0	1577.26	520.119	971.322	1575.49	12588.5	87044.3	6537.89	10579.4	2211.72	90.976	1396.47	12972.5	6802	660.431	1643.78	931.168	1062.06	1136.38	495.986	185.344	17651.4	504.159	1091.09	19788	1798.54	4556.24	6426.57	1537.81	1976.38	6795.67	17130.1	402.347	806.644	62687.1	2249.92	823.226	3628.86	77863.3	682.196	611.893	6916.34	5186.28	6085.87	0	922.959	4611.86	3033.9	1482.33
27	1	3069.34	704.887	397.961	1133.93	9744.91	103027	69184.4	10874.4	1304.37	1678.6	2011	14526	40353.4	343.218	2425.24	935.139	1896.53	1189.61	4753.73	1686.5	23500.6	2947.66	456.515	20656.2	1295.97	4870.29	6290.21	1555.22	886.577	14238.5	33091.3	348.254	551.286	72110	5475.16	355.612	24617.8	93041.6	3326.01	784.675	9532.7	6757.66	7237.28	61.2843	10.5107	400.361	3750.71	567.696
28	0	1110.46	505.522	1646.26	1567.79	9037.48	96774.3	26808.9	16089.3	3168.64	475.472	1241.07	13042.1	161750	467.948	2781.91	1806.55	2237.96	1599.58	1138.93	1311.09	23802.8	1294.88	751.434	20913.7	1163.56	5288.43	4979.96	1217.15	995.294	11482.5	26569.9	280.077	1012.11	73699.2	1178.4	697.377	29722.5	96133.3	2971.43	5139.82	19339.2	6508.26	13794.5	5.44304	1075.06	4687.27	6935.58	2165.66
29	1	1078.39	770.147	1016.11	1582.52	7494.84	99891.4	51506.9	12732.3	4763.71	604.527	708.37	11382.4	54468.4	2158.94	657.178	7752.83	1961.99	2473.9	3066.3	1215	17267.7	1210.54	1370.72	20947.9	1474.13	4396.79	3973.48	1344.45	425.631	10435.6	21679.5	1117.05	1576.15	47745.9	1564.92	2165.58	9646.37	95306.8	4439.43	5114.88	6713.8	6086.07	5979.41	99.6687	3762.6	3484.96	2379.37	689.614
30	0
31	0	6769.92	471.68	785.085	1167.59	8010.86	102712	65929.8	9051.08	1156.25	819.775	547.339	15975.7	25955.5	498.32	3122.25	1124.47	1584.28	1307.74	760.587	1385.11	39079.3	1384.45	524.348	14044	1659.07	2470.18	3953.86	935.23	2372.75	14255.5	27083.2	59.1902	1047.02	50548.4	1659.5	475.452	23431.5	105757	624.523	1397.39	8796.93	4451.45	8292.67	84.4112	280.853	809.444	2032.61	633.979
32	1	378.207	1072.74	1609.19	1753.03	11234.4	79010	28636.3	11083.4	2082.9	502.801	941.21	10759.3	20273.7	655.588	3038.01	2434.3	504.024	1361.46	1083.89	1278.67	29673.8	1277.06	676.562	24186.2	748.26	3962.87	4608.19	676.711	225.635	14760.1	27293.3	660.494	1131.76	75503.9	1639.31	885.104	17488.9	97736	1067.96	3209.75	3235.61	4172.49	2882.74	42.2576	823.225	2087.26	3272.65	1095.62
33	0	7212.35	1402.57	1315.37	1845.81	6075.8	74111.2	23030	12590.3	7521.02	2269.67	5480.03	18303.2	43060.9	613.66	3565.45	2974.93	2315.79	5899.12	5242.39	1428.31	25734.1	3491.24	2208.01	20324.2	2440.35	3264.65	8687.63	5864.91	2897.61	13427.8	29258.8	680.867	2116.93	69062.8	7734.35	1620.11	24993.7	91389.3	7881.88	1354.55	9889.02	5744.92	7177.77	605.682	2354.66	3471.75	6693.33	2712.52
34	0	13818.9	567.293	948.795	1155.97	12992.4	79772.4	35512.6	16897.7	3131.61	1515.06	4769.95	29699	67516.5	312.918	5905.86	2692.68	2622.37	2473.99	788.016	1312.87	38267.5	7963.58	0	22731.5	1085.87	2424.73	8682.4	3380.55	2754.14	10009.7	42081.6	0	422.293	123057	5833.92	275.376	56051.5	116436	6247.22	5229.11	15933.4	2339.82	4737.52	88.8367	0	1005.32	2770.24	367.313
35	1	2375.28	1075.54	1823.91	2039.08	11735.1	80090.4	2230.81	11313.7	1797.77	516.548	1000.7	16860	2953.86	1243.05	4176.51	3147.26	4928.84	1392.74	2791.26	1054.67	23426.1	879.922	1974.36	19234.9	2594.32	1774.88	2885.96	1042.68	411.172	15810.7	29070	888.444	1141.25	79352.6	3432.07	1683.44	3862.66	94925.5	1265.59	423.007	9624.41	3103.76	4342.36	10.1958	1719.65	520.997	4274.86	589.82
36	1	4503.87	469.576	490.853	640.751	8849.3	114612	64832.7	13527.1	994.571	455.251	279.879	14595.8	123842	3723.76	1016.22	6487.23	2918.18	1295.84	1281.92	1171.57	32906.6	992.3	985.044	17841.5	1049.74	6611.85	2541.13	575.816	64.5201	8717.23	25146.6	910.512	1303.75	52339.7	706.435	1809.9	32951.5	94233.5	979.905	806.284	5323	4915.12	6974.38	97.5459	1637.89	302.819	1609.45	58.4992
37	0	4885.22	777.224	1697.05	2554.81	11093	105167	121348	17521.5	941.505	785.743	2199.45	15401.6	375392	2302.79	2082	1804.85	3837.79	2389.06	1860.99	1635.32	37093.1	1728.33	774.621	15244.9	1733.91	6185.02	8611.66	691.842	275.155	9840.52	27246	343.12	919.351	93481.4	1725.8	462.016	99425.5	124686	6383.36	15170.6	11279.3	7841.67	10047.9	166.648	529.114	3224.54	3070.59	815.512
38	0	3483.9	2162.2	5700.09	7808.27	12175.2	107428	4734.76	14866.7	3668.66	1128.47	4736.58	12884.9	8881.18	1011.41	3293.64	1818.89	3946.88	2608.05	1331.66	1043.55	35092.5	1477.15	1157.91	29002.9	3151.93	1870.44	9235.52	6994.97	9527.05	11521.1	24369.4	647.935	2409.73	43995.1	4679.68	834.248	9246.48	92550.2	4212.43	2501.86	15354.5	8245.51	3756.68	1597.71	1699.37	12781	9372	7654.53
39	0	3027.3	778.635	821.821	1063.7	10191.7	87434.6	30707.4	24622.4	7173.37	567.79	779.738	12249.4	15896.5	2582.99	4016.91	933.985	2399.62	3916.55	1522.36	885.335	32930.2	1408.93	234.394	24913	1440.93	1073.82	8951.35	1954.42	3164.71	11288.7	25479.9	529.814	740.715	46950.3	1976.57	320.749	37547.2	113406	6772.21	13893	13824.9	4089.11	9878.89	60.2718	1089.16	11895.6	2814.48	5201.59
40	0	4556.85	823.648	855.891	1225.94	14581.9	85812.6	17050.8	11956.3	1856.11	619.803	364.754	15010.7	9229.42	3850.65	769.789	1336.1	2860.89	3304.78	1459.27	943.75	16701.2	1360.13	608.582	17903.3	1566.48	2011.87	5967.94	1468.85	2728.56	11242.1	26280.2	431.341	949.025	76223.8	2371.71	649	18613.2	101825	3347.4	30878.7	15496	5028.44	6144.67	202.255	1423.23	1301.85	3427.55	742.398
42	0	129613	1407.68	2241.83	3421.84	11053.4	100868	101579	5453.92	3851.63	2736.76	8271.79	165043	40188.4	1595.46	7101.59	3255.67	4622.45	2533.36	2131.52	1198.01	99849.2	10419.1	634.24	15713.1	1503.82	4762.49	7757.41	6151.56	2950.37	17029.4	105690	796.365	2115.46	175235	10233.2	1272.33	76053.2	163226	7782.24	8624.42	20206.9	5940.46	9011.44	53.1367	2328.46	2437.45	5506.59	745.887
43	0	175.274	1121.45	216.479	1357.67	12961.7	104774	39047.4	18427.9	1523.32	588.23	3267.86	12779.4	22476.3	2686.72	9393.72	2447.77	2249.75	2179.17	1498.71	1314.33	27843.7	1175.81	371.646	20017.1	672.009	2982.27	6310.12	107.098	3665.08	13971	21764.5	92.2373	550.457	80656.7	1560.86	668.99	33282.3	93939.6	2692.55	2257.33	17352.3	4525.22	16047.4	80.6541	854.139	1904.84	3970.7	993.965
44	0	1043.71	570.08	379.181	309.748	12752.7	89778.1	41031.8	13122.1	2457.96	617.842	269.768	14022.5	55691.6	934.392	7466.72	2454.05	2371.24	1532.23	788.459	1202.35	29394.9	969.125	484.447	33918.4	876.955	3203.81	10482.4	978.246	926.453	10528.4	21814.6	62.5453	641.09	60426.6	2832.42	645.837	15118.3	117852	4127.47	3081.36	17302.7	2612.15	1920.54	136.149	155.246	401.157	2841.09	617.437
45	1	692.253	724.296	1036.87	1627.65	13316	123600	105441	12032.6	1878.04	809.362	979.266	9507.97	167026	447.903	4440.2	1605.72	4380.92	1659.86	2125.26	1648.38	38002.4	1624.85	690.343	23437	3563.88	5938.34	13140.9	971.831	1836.98	21266.1	29476.2	576.78	1437.6	77605.8	2546.87	959.58	43516.6	114511	4555.96	2414.41	18310.9	9692.42	11756.1	340.116	1168.37	3107.61	8296.44	991.814
46	0	7239.72	1092.19	1513.19	948.215	9420.39	105110	79745.9	16233.4	2029.09	1229.7	970.525	11866.1	106708	681.604	1806.44	1835.84	1945.19	1809.12	1746.1	1397.72	31899.4	2292.04	1048.37	11412.1	1344.96	5106.91	4509.65	1283.94	794.756	15082.3	34813.4	553.799	1759.26	51690.1	2216.89	1292.47	75621	103587	3697.41	11735.9	13673.1	10494.2	3318.19	631.402	1930.89	5922.77	1322.68	1405.83
47	0	2862.02	596.397	4747.03	4447.45	8334.34	99315	12613.2	14634.5	1565.64	868.002	1407.4	15633.3	9294.17	409.351	2393.95	1195.89	4367.47	1633.12	1050.15	1623.82	49760.8	1434.62	492.269	15690.5	909.582	2431.39	5526.06	842.523	4124.35	13089.9	29762	669.727	1458.96	76639.4	1595.05	922.261	36845.3	133324	955.75	17622.6	8623.13	5956.61	6612.09	432.725	2230.76	2773.49	2364.84	1379.67
48	1	6216.54	831.261	2773.42	2848.27	11931.4	120223	46650.6	8804.98	5257.44	2750.85	3558.03	15358.5	133723	1047.67	4487.04	2816.62	3695.49	4817.54	2744.37	1507.82	37724.7	3432.32	1168.16	10918.1	1807.96	3082.75	5489.45	2662.91	1238.4	25745.5	34203.7	1071.57	2038.03	82329.5	3931.96	2337.58	32692	113944	5131.91	1138.05	13485.3	9659.53	9247.7	412.253	1608.89	5809.77	2977.73	995.344
49	0	10186.8	1573.06	1983.65	2706.6	3279.75	111054	7242.06	11720	5162.61	2074.37	3136.25	21227.3	10810.7	1487.29	1655.45	3045.42	2995.32	4070.31	1791.14	1273.78	35895.4	2020.75	1061.72	24573.8	2385.31	946.542	8557.92	2900.98	1933.59	24220.7	31584.7	668.273	1352.53	65388.1	5113.25	1002.13	12046.8	134289	2607.36	1525.78	9680.83	4471.1	2189.74	874.421	983.481	3523.26	4501.87	3871.1
50	0	1842.17	541.033	1705.62	1529.85	12756.5	106423	15603.4	18238.5	3633.1	510.184	857.244	12977.3	23347.6	6077.6	1205.96	3146.25	3309.67	2683.24	4974.46	1235.82	30061.3	1061.54	871.587	9837.26	1362.47	4382.4	5353.38	5267.14	477.027	16783.2	25954.5	759.314	1044.41	53958.9	927.734	824.94	15762.7	113421	4576.05	1411.73	9782.78	8120.03	7638.61	55.316	1309.14	3101.05	1885.16	797.684
51	0	1426.85	1193.12	671.295	2531.64	11356.1	108988	5342.78	19326.9	1599.83	727.895	846.958	18821.7	20048.4	2429.79	4284.03	3516.96	1603.51	1618.02	718.805	1475.59	38483.3	1449.91	710.484	14693.3	856.854	3018.87	3771.09	1897.15	5054.31	14126.6	31007.2	593.28	1634.78	65858.8	1662.74	1391.21	17550.3	109040	3387.21	1507.56	9802.5	6311.82	22617.2	108.493	1946.57	2170.97	3139.79	1397.2
52	0	617.696	625.56	2620.77	1981.3	14247.4	110059	9446.84	19549.9	4546.08	520.961	2401.23	12464.6	11668.4	1452.03	2894.17	2311.95	3316.27	1933.77	1251.54	1292.71	37210.1	1276.92	936.816	23886.1	1094.48	2268.71	4289.29	1669.73	275.614	12078.2	29155.6	558.657	919.056	66555.4	1477.98	928.961	12597	107006	2809.21	717.065	7703.63	5492.21	19824	198.644	1694.29	2075.93	3238.16	339.752
	P VALUES	0.398579	0.639085	0.962595	0.962595	0.573588	0.398579	0.121711	0.0606668	0.925271	0.851197	0.260356	0.260356	0.121711	0.707524	0.348266	0.0827014	0.707524	0.348266	0.110818	0.372897	0.241017	0.707524	0.159446	0.778413	0.302187	0.173818	0.205426	0.205426	0.0129337	0.542079	0.888112	0.0167663	0.159446	0.778413	0.742696	0.0215619	0.814605	0.573588	0.814605	0.173818	0.121711	0.672966	0.925271	1	0.707524	0.348266	0.573588	0.159446
[truncated: 152 more columns]

## Sheet: POST
Patient ID	PNEUMONITIS_0vsOther	4-1BB_Post	6Ckine_Post	Activin A _Post	AgRP _Post	ALCAM_Post	ANG _Post	ANG-1 _Post	Angiostatin _Post	AR_Post	Axl_Post	B7-1_Post	BCMA_Post	BDNF_Post	bFGF _Post	BLC_Post	BMP-4_Post	BMP-5_Post	BMP-7_Post	b-NGF_Post	BTC_Post	CathepsinS _Post	CCL28_Post	CD 40 _Post	CD14_Post	CD30_Post	CD40L_Post	CEACAM-1_Post	Contactin-2_Post	Cripto-1 _Post	CTACK_Post	CXCL16_Post	DAN _Post	DKK-1 _Post	DR6_Post	Dtk_Post	E-Cadherin _Post	EGF_Post	EGF R_Post	EG-VEGF_Post	ENA-78_Post	Endoglin_Post	Eotaxin_Post	Eotaxin-2_Post	Eotaxin-3_Post	EpCAM _Post	ErbB3_Post	E-Selectin_Post	Fas_Post
1	0
2	0
3	1
6	0
7	0
9	1
11	0
12	0
13	0
14	0
15	1	262.25	227.206	737.219	655.604	10625.5	106228	10837.9	17364.8	4116.22	7.68329	484.125	8008	2432.16	1507.19	1692.03	7947.65	4172.72	3663.28	2644.36	248.061	16139.7	468.681	904.08	24047.3	848.25	7243	9684.12	381.167	35.9927	6263.12	17853.1	496.742	1101.25	60070.8	1732.33	529.367	12202.2	99445.8	5699.55	789.733	21031.6	2515.63	4700.36	0	1229.65	1362.25	2939.75	583.333
16	0	156.903	503.905	501.716	1169.08	10141.8	111710	41933.9	22976.5	807.224	59.7044	336.815	10890.9	28798.5	427.031	1043.82	1134.84	1637.18	1244.83	1444.59	224.488	20342.5	899.944	311.633	23084.5	1067.72	2318.17	8113.42	2271.54	0	10990.8	22047.1	0	1543.94	56849	1032.72	149.48	14353.3	105638	459.13	5649.76	9916.62	5007.74	11431.6	0	691.713	1128.06	3540.72	476.583
17	1	18760.4	1082.17	9849.38	7157.04	15771.3	131231	46958.1	15241.6	5281.07	501.618	11253.8	32880.7	15984.1	2109.71	7125.98	10954.7	6488.62	5469.94	4975.82	686.053	37259	1676.65	7341.57	32936.6	6589.73	1271.82	11321.5	8276.43	15766	11509.1	27481.9	1746.41	2643.88	84191.8	9565.73	6517.95	16280.5	115209	8914.85	2645.29	6830.43	16542.6	11013	392.626	9377.08	24269.8	12203.7	9278.29
18	0
19	0	3327.65	588.904	776.635	2318.55	9640.78	108728	10731.7	18260.7	3984.16	418.426	2446.63	16463.9	24782.4	3438.37	3186.92	4234.32	2572.8	3706.82	2462.55	518.196	24904.6	954.125	2055.69	34952.8	1888.23	4141.15	5145.18	2492.67	689.577	10922.9	22010.5	1163.5	1958.13	65963.1	2409.91	2154.26	18629.5	105438	4326.54	1775.03	6458.26	3925.71	2422.39	113.132	3735.87	1957.12	3754.18	2140.72
20	1	5550.25	2082.59	2096.09	3930.36	12919.6	108096	56052.9	13929.7	5175.05	2450.31	2859.84	19283.2	260539	5294.26	3191.6	5123.95	4860.04	3814.41	2560.59	1315.81	27613	2532.03	1450.76	36188.2	3239.29	5524.24	7143.71	3140.75	1270.6	18835.8	25118.2	405.204	2583.96	58650	3793.18	886.337	61861.8	103020	8485.13	7392.78	8818.14	6770.65	12464.4	1393.83	1168.11	2834.3	4530.73	3827.23
21	0	405.398	347.457	651.487	2316.62	10928.3	107773	10099.4	7321.39	1618.12	537.079	663.205	11701.9	6845.51	422.298	26166.5	1839.33	2240.35	3102.23	2426.47	417.169	22479.9	758.366	599.009	24109.7	1308.68	7736.47	7006.3	849.292	915.396	24512.9	25067.4	348	704.345	81886.1	2016.69	619.368	6005.94	100636	4320.23	159.185	5604.18	7053.51	4010.03	71.9214	1493.54	1271.66	4543	2570.04
22	0	2085.43	549.743	720.763	1461.15	11502.6	99847.6	17157.3	17931.6	1679.09	270.35	2340.33	14645.8	11368.1	915.637	1395.07	1531.98	2107.4	1113.59	1560.8	321.913	23271.1	591.628	613.777	16699.7	941.296	4526.38	5099.2	3298.5	740.623	6359.29	20803.8	320.011	583.829	66414.3	1815.76	556.324	11896.7	98871.7	1452.66	257.816	3612.34	4453.13	10790.4	87.3401	658.345	3899.87	2926.29	1326.65
23	0	768.267	406.662	2529.51	6296.22	16040.8	105897	12181.6	13630	3279.88	314.812	1927.72	12375.3	6239.24	381.901	5639.76	1986.08	5439	5125.77	1697.56	441.85	23693.7	1067.09	1249.41	27724.6	2296.65	2030.17	5379.05	2738.57	8702.95	15318.4	23456.7	424.888	465.612	88863.6	3012.06	541.382	7428.42	98734	4052.2	295.18	10727.8	11300.8	9781.23	20.5084	713.826	6319.85	4696.76	2538.62
24	0	69506.1	959.244	579.537	649.154	13048.7	94548.1	17133.8	13109.7	3828.48	5912.45	12206.3	87003	11741.9	1078.95	20502.6	1702.65	5162.4	1889.55	3210.09	437.19	86542.5	15260.4	641.176	22569.8	1096.6	3369.21	10522.2	7237.09	4808.33	24672	137369	184.674	1055.07	148148	12194.3	998.821	12127.3	137372	15050.8	2323.86	11770.9	9922.71	8879.33	117.994	811.716	1799	6304.87	989.633
26	0	4011.77	365.986	1660.31	2198.07	7984.98	98889.1	4497.33	16348.4	4739.65	406.743	1483.34	11194.7	4806.01	2746.05	3270.4	3330.91	3189.85	4160.45	2746.66	773.976	23806.9	851.609	1914.75	20126.1	2128.86	2325.32	5762.92	1132.01	6154.14	8153.16	21665.2	802.821	1803.72	50752.2	2044.83	1181.37	6995.55	89190.7	3274.05	1491.11	10439.4	4797.72	6935.13	183.409	1528.69	3351.81	1790.09	2301.37
27	1	274.093	797.603	298.43	1205.19	18316.6	90131.6	19076.9	14151.7	488.707	822.324	1208.11	10526.5	4963.19	339.792	2318.3	729.157	1719.9	852.162	2972.82	1372.83	22372.6	1270.68	268.2	20562.9	1442.53	0	8318.81	935.769	371.851	15003	29891.8	266.794	598.266	94341.4	2830.3	434.288	13267.1	103356	2683.67	1015.26	7586.68	6962.95	12876	148.628	219.868	1254.04	4426.51	1203.08
28	0	933.779	479.466	1378.81	1594.59	10363.9	84061	6461.08	14484.5	3381.32	418.905	1264.37	12427.1	8549.26	375.96	3130.48	1289.11	2241.8	1634.59	854.402	1235	22417.8	829.582	536.182	25347.4	1346.87	3926.96	5423.74	1154.74	725.197	14551.8	29166.3	398.263	715.593	93569.4	1308.83	818.936	13104.8	100176	2488.29	2017.35	10241.6	6658.08	18411.2	15.7689	1192.48	12591.2	6982.88	2538.6
29	1	1659.86	741.492	1148.13	3144.59	9678.63	89213.6	36696.3	16967.1	3442.68	626.429	711.185	12474.2	21037.4	2344.71	1632.45	7289.51	1975.46	1892.56	2297.18	987.456	25759.1	963.7	1281.16	16900.5	1094.18	1810.19	4066.55	1096.18	306.88	18692.7	26352.2	1283.38	2073.26	78958.7	1621.28	1989.83	15764.2	106588	4693.23	8000.91	7460.81	6469.38	2824.97	126.702	2093.06	5772.05	3358.89	1019.45
30	0
31	0	4360.73	417.088	895.249	1201.14	7188.14	94945.5	6496.45	8554.87	775.55	551.526	802.321	13656.4	1118.86	0	2245.1	233.095	0	765.97	0	1055.7	34075	1204.36	460.683	17253.9	1010.93	888.487	2116.41	898.095	4160.42	12193.3	27620	270.94	624.097	71743.2	1668.48	497.63	3335.07	93171.5	0	248.614	9217.39	3363.72	3215.34	7.51305	420.552	1732.7	1991.31	684.409
32	1	1567.92	1102.18	816.48	1617.7	10626.1	92380.7	11968.4	15229.5	2258.33	457.102	400.943	14286.6	9328.57	522.569	10677.4	1367.17	529.76	1217.51	421.356	981.54	33620.1	894.514	674.905	27373.4	402.815	4051.5	4965.96	635.773	207.385	13282.5	29626.1	529.71	808.205	96257.2	1739.37	774.848	15003.4	97328.8	943.546	1368.04	2715.98	6662.26	3115.29	102.908	675.422	1190.4	4196.82	1206.22
33	0	17328.5	3971.81	2008.8	3669	5952.98	96698.7	8353.38	16554.2	12196.5	7986.14	13759.1	36440.3	7624.57	1435.98	11487	4948.96	4030.32	7556.68	6554.89	1723.21	34344.9	8302.77	3739.48	22011.5	3684.78	4212.86	13635.6	11296.9	7511.92	17368.1	33507.2	1207.63	3031.39	89235.2	17243.1	2789.13	15654.9	88828.6	14631.2	3107.99	20166	6778.97	5295.56	2939.87	3758.3	5826.46	9888.02	6247.28
34	0	38210.8	737.097	1837.96	2029.93	10960.5	95581.5	10959.9	23795	2696.05	1632.61	6486.66	65410.6	11328.6	515.292	5425.98	868.428	2663.79	2464.47	266.661	1066.94	67109.9	10523.2	652.075	17816.3	996.955	1278.32	5649.7	3942.16	6484.8	14730.2	77922.5	617.404	778.946	113528	4562.75	777.533	14099.1	196393	6310.33	2345.92	9848.06	2215.37	5156.92	246.821	554.054	1144.73	3999.45	415.8
35	1	2339.25	1186.84	1469.16	1972.1	11884.7	99815.9	3768.25	11173.6	1450.53	623.692	1154.05	14517.6	3957.89	986.3	4235.41	2947.44	3972.49	1816.81	1828.83	1252.18	31590	892.219	947.096	14870	2819.46	1993.72	3590.77	1111.59	96.157	19831.7	26057.1	444.537	1061.38	98268.4	2515.66	1194.16	8640.04	100702	941.259	611.385	10042.3	3490.7	3781.12	158.015	1067.29	519.519	5239.21	716.301
36	1	14221.1	471.443	267.627	79.1976	10616.9	120158	79555	17289.2	1153.49	418.435	480.549	28266.3	48673.2	1414.26	835.392	2719.15	2188.39	1150.94	1127.67	1182.48	43338	1211.68	147.204	21550.1	983.145	7429.91	4133.51	456.71	0	11640.1	40032.8	61.1199	872.704	97859.7	848.534	238.454	31341.1	111138	1845.67	2105.47	7647.16	10534.3	8107.66	102.732	457.969	465.313	1695.99	589.618
37	0	2287.35	644.177	601.239	1213.7	8115.06	97758.2	75727.1	13538.5	772.267	482.254	1329.2	14420.7	110174	2419.65	1636.36	1412.97	2467.2	2546.27	1392.67	1373.42	31320.8	1222.86	88.4443	24203.1	1238.57	6614.3	6596.16	901.92	0	7506.22	26804	0	553.364	78485.5	1399	292.466	39348.2	116616	6517.39	774.7	8774.57	7090.34	12256.9	89.749	191.76	1448.71	3585.41	1042.69
38	0	1072.56	1230	4625.91	7945.93	11157.3	100313	4689.07	12685.3	3112.42	1008.33	4749.31	12731.9	9315.49	986.369	3671.51	1981.47	4573.35	2543.68	691.43	1255.82	29308.1	1274.43	910.683	29392.2	2939.43	1661.5	5752.37	6691.21	6995	8956.49	29241.8	573.056	1736.5	46281.5	4684.26	1058.22	9284.63	93764.4	3610.83	351.332	11535.5	8471.04	4697.87	507.079	1933.02	10468.1	6262.67	5549.76
39	0	2099.89	831.315	711.988	1018.21	8577.99	99780.4	14723.4	19594	3276.53	522.383	654.934	11916.6	7433.38	1429.35	4564.31	700.711	1258.79	2538.46	844.225	781.607	32392	1042.44	436.637	34182.2	822.616	374.008	5731.22	1251.82	183.131	9849.26	27789.3	605.205	658.88	61725.5	2070.65	615.844	20604.3	126273	3289.48	3318.06	6657.88	5182.09	7347.88	91.6186	1072.23	7986.48	2712.19	2336.16
40	0	2076.7	983.379	969.911	1073.56	11662.7	105947	9933.11	14612.4	1846.57	652.464	517.839	11469.7	6203.98	2711.53	1360.41	1007.28	2690.92	2745.85	1150.82	839.775	22226.1	1140.81	536.47	23267.5	1605.98	1123.24	5759.14	1239.58	3263.6	12608.1	24240.1	377.687	486.951	70088.8	2163.41	676.543	11042.4	109795	3963.93	9409.22	14966.1	4148.07	5855.32	170.512	675.171	1345.36	2993.49	866.628
42	0	85175.6	895.859	2176.97	3623.92	13571.5	99640.2	15405.9	7668.7	2776.36	1821.79	5013.28	95948.7	3175.27	1095.75	6184.82	3153.41	3131.54	2057.15	1601.48	876.953	68506.1	4719.76	898.354	20007.5	1108.49	3038.58	8076.68	3944.52	2226.65	14795.7	71481.3	664.894	1133.81	174834	5918.24	1135.18	8705.49	150557	5180.98	519.074	16420.5	4273.19	5844.45	143.063	918.525	2223.96	4544.36	1014.98
43	0	417.262	1096.35	612.363	2070.09	14914	107740	3542.62	18226.7	3187.57	627.777	1418.91	10686.4	1659.67	2357.27	4150.29	2309.44	2018.84	2751.74	1007.06	889.623	25626.5	753.622	693.719	31751.2	913.15	1817.18	5943.91	889.358	7433.31	12744.6	23029.7	499.596	707.622	83281	1963.68	897.497	7312.28	112148	2304.59	353.18	16302.2	6907.63	21918.4	95.1896	1068.32	4320.12	4307.74	1843.38
44	0	801.506	666.716	523.539	721.489	14978.5	112934	14096.2	16185.6	2310.68	468.09	384.369	8885.59	17024.5	898.627	1856.61	1899.59	2413.28	1799.56	396.137	1162.46	24853.7	787.916	526.352	20311.1	1061.85	2291.96	7901.56	1352.67	1711.66	8171.45	22243.7	499.774	768.083	62747.5	2081.26	574.679	3992.32	120503	3222.86	355.127	11915	3842.48	2180.92	64.483	343.401	1328.46	2349.84	852.625
45	1	935.703	989.331	1429.9	2777.67	6310.13	119212	38318.3	18303.1	3505.35	577.898	1114.04	9915.7	46231.6	2740.09	4048.32	8550.11	4043.6	3785.28	2905.01	1186.01	45491.8	1046.11	1485.08	20886.2	1941.77	4392.82	9826.58	1288.11	3474.74	19279.7	28901	1391.07	1819.65	65098.9	1884.87	1934.9	42750.4	121580	6617.95	4692.87	18140.8	9018.25	10526.8	229.123	2427.32	6354.17	4800.91	1451.76
46	0	4989.46	877.622	1580.38	1106.12	11314.5	106613	29993.5	15305	1635.84	1023.28	973.74	12876	28991.1	411.269	2068.46	1309.09	1540.82	1666.88	955.524	1104.56	28584.6	1830.14	675.44	16994.1	1144.71	4972.02	3885.31	855.49	698.462	16477.4	33897.3	534.347	1551.12	58467.2	2180.94	760.122	19023	105224	2638.95	1912.65	4843.24	10957.9	1939.28	227.793	2212.42	15089.8	1126.6	1248.69
47	0	2115.98	562.678	2528.49	3510.74	10965.6	102623	6568.34	16449.7	2053.97	898.127	1666.49	13862.4	4849.75	620.949	2040.23	1465.38	4758.18	2250.18	1415.83	885.841	31346.1	994.381	600.058	17502.3	974.735	1544.47	5753.13	1379.78	4923.31	19007.6	30184.1	507.481	1008.39	82282.8	2602.01	801.293	13912.4	126615	1724.8	1119.59	5689.62	8683.83	8826.1	205.222	1043.34	4046.46	2240.39	2181.18
48	1	3679.02	697.735	3112.2	2497.6	9452.5	110271	14706.1	10058.4	3746.69	2543.68	3111.96	10536.8	12347.4	661.115	3609.56	1895.37	3260.96	4460.48	1601.02	1112.52	39865.1	2035.65	1123.05	14744.3	1913.33	2784.81	6360.43	3641.59	1257.33	32249.5	35329.7	748.347	1382.15	99030.1	3583.28	1706.32	12795.9	126131	3761.14	592.7	9036.19	6629.95	5438.64	238.509	1750.59	2810.51	5252.73	1663.07
49	0	4438.04	1216.97	1215.44	1842.35	2610.12	108966	3378.94	13296.1	3161.8	1946.94	1357.3	14051.7	2800.48	689.082	1286.95	1871.73	2134.48	2337.93	547.741	975.577	24307.3	1119.28	781.63	28523.1	1294.27	352.184	5834.17	1465.96	1394.66	24530.5	28614.5	587.991	952.543	68455.3	2780.77	887.77	2658.59	132923	1107.27	748.711	5983.81	3216.67	2573.77	455.627	635.482	1600.39	3117.87	2267.4
50	0	209.608	515.724	963.36	1371.43	14639.5	107106	14637.8	20562.1	1552	1406.86	954.296	9427.89	10719.5	3838.29	1132.78	1153.54	1820.27	1322.13	2829.09	957.446	24292.7	1110.75	363.834	19878.7	1309.52	4489.72	5673.64	5712.87	340.528	19595.1	26681.8	532.912	853.269	72366.7	1451.46	487.486	18593.2	113996	1571.81	811.937	9519.26	9405.88	7464.76	171.561	462.569	1561.26	1983.38	1387.91
51	0	1403.66	1016.65	576.248	1797.63	13261.4	100387	2225.95	17682.3	2195.72	1041.94	694.755	13291.4	8484.72	2545.83	3882.38	3533.47	1503.5	2085.04	1064.18	1143.99	23776.1	1159.51	619.404	17189.6	784.543	2919.65	3921.68	1801.1	6584.95	20202.8	21345.9	780.698	1080.5	86505.2	1302.74	1091.52	7987.99	95146.1	4213.01	616.313	8134.46	6684.95	21034.3	236.13	1876.37	917.413	5004.83	1209.16
52	0	562.344	507.649	3250.48	2408.26	12973.6	110586	10064.6	23276.4	6156.74	529.121	2650.98	11857.4	5172.08	1638.44	2821.74	2772.58	3707.87	2660.17	1344.36	1085.61	39362	703.371	978.112	16781.2	1481.54	1799.32	5749.14	2166.95	463.192	14194.6	27848.7	429.406	850.498	88436.7	2007.86	976.142	10139.8	104102	3772.39	446.892	9305.7	5391.85	19080.3	147.234	1306.47	1615.34	3579.02	460.833
	P VALUES	0.879829	0.273036	0.791337	0.596701	0.96985	0.472676	0.0191099	0.596701	0.496292	0.791337	0.427355	0.762369	0.185877	0.54535	0.909722	0.0211339	0.364346	0.791337	0.0493662	0.150927	0.325751	0.762369	0.131	0.821	0.406	0.496	0.571	0.151	0.076	0.427	0.545	0.496	0.059	0.29	0.94	0.364	0.94	0.028	0.521	0.104	0.623	0.521	0.94	0.374	0.406	0.496	0.273	0.571
[truncated: 152 more columns]

## Sheet: POST-PRE
Patient ID	PNEUMONITIS_0vsOther	4-1BB_DIF	6Ckine_DIF	Activin A_DIF	AgRP_DIF	ALCAM_DIF	ANG_DIF	ANG-1_DIF	Angiostatin_DIF	AR_DIF	Axl_DIF	B7-1_DIF	BCMA_DIF	BDNF_DIF	bFGF_DIF	BLC_DIF	BMP-4_DIF	BMP-5_DIF	BMP-7_DIF	b-NGF_DIF	BTC_DIF	CathepsinS_DIF	CCL28_DIF	CD 40_DIF	CD14_DIF	CD30_DIF	CD40L_DIF	CEACAM-1_DIF	Contactin-2_DIF	Cripto-1_DIF	CTACK_DIF	CXCL16_DIF	DAN_DIF	DKK-1_DIF	DR6_DIF	Dtk_DIF	E-Cadherin_DIF	EGF_DIF	EGF R_DIF	EG-VEGF_DIF	ENA-78_DIF	Endoglin_DIF	Eotaxin_DIF	Eotaxin-2_DIF	Eotaxin-3_DIF	EpCAM_DIF	ErbB3_DIF	E-Selectin_DIF	Fas_DIF
1	0
2	0
3	1
6	0
7	0
9	1
11	0
12	0
13	0
14	0
15	1
16	0
17	1
18	0
19	0
20	1	2570.82	1066.57	273.888	1411.3	-903.492	9901.92	22092.9	1238.52	-221.808	1519.11	978.205	3433.94	178927	2090.5	1399.01	-533.83	141.787	59.5002	494.424	545.957	4387.62	1338.07	406.359	4064.24	959.334	1600.31	920.578	-491.82	531.322	8885.25	2102.07	-45.2631	770.539	12273.7	1022.48	56.1923	40479.6	1829.59	-957.924	6094.94	5587.11	1299.61	2196.38	656.275	267.301	-1490.02	364.651	596.202
21	0	29.3348	-82.3267	-397.586	183.693	4947.99	16309.3	-35501.3	-2915.8	128.127	427.042	-361.864	-2901.76	-60082	204.275	13148	-567.818	-2921.16	491.529	-41.3827	13.8583	-8156.63	-161.88	124.452	-3572.72	118.679	323.171	3621.85	-439.022	786.302	-1972.32	1749.23	148.583	140.419	28015.5	572.629	304.085	-22275.4	9619	1344.27	-654.015	2035.91	1437.77	1052.48	58.2864	521.32	-380.18	2097.64	1511.98
22	0	797.333	13.7345	83.7467	111.909	2739.64	9900.48	-11119.6	3806.59	110.684	-149.575	-131.131	-18.4531	-8900.03	227.515	-0.0294921	483.47	259.091	31.1985	206.984	-56.6981	2485.85	-381.926	65.47	-2960.18	-5.80465	139.022	285.999	169.025	21.5474	-1994.68	-3309.75	51.7763	-46.335	5447.59	278.228	-25.7961	-1791.5	-1243.35	-154.908	-257.833	-3680.95	956.875	1748.83	77.3391	78.292	-1339.86	625.212	17.8833
23	0	-318.031	16.0065	-11.4549	1173.88	5010.14	14759.1	-11378.5	2858.12	-504.663	-80.6631	-380.226	-886.743	-6925.91	54.9759	850.779	-582.967	-118.602	-1366.75	-886.902	2.8795	-6258.56	207.284	135.812	-1532.83	135.368	-537.865	636.453	-419.849	1625.41	3451.77	1696.62	-204.285	-363.61	35910	345.98	-42.8774	-5318.95	34229.9	-2496.16	2.53316	7232.29	2764.97	-799.4	-116.29	-188.335	676.325	1096.36	369.606
24	0	60859.2	488.414	-409.228	-608.679	4565.7	12237.4	3116.16	-2250.96	1163.54	3710.48	9302.39	64690.7	-19647.1	238.458	9221.13	252.012	2154.6	381.553	-1787.04	-129.75	56246.1	10326.5	-95.1254	1691.67	107.09	1235.45	3795.23	5136.98	3073.57	11221.4	107006	-109.483	273.321	98759.5	9258.75	379.358	-1065.41	45203.2	7298.55	853.895	7534.34	4462.22	4618.87	3.38875	394.297	-679.899	3245.21	362.416
26	0	2434.52	-154.134	688.991	622.582	-4603.48	11844.8	-2040.56	5769.03	2527.92	315.767	86.8753	-1777.79	-1995.99	2085.62	1626.61	2399.74	2127.79	3024.07	2250.67	588.633	6155.44	347.451	823.658	338.054	330.32	-2230.92	-663.648	-405.803	4177.77	1357.49	4535.12	400.474	997.08	-11934.9	-205.091	358.141	3366.69	11327.4	2591.86	879.221	3523.09	-388.554	849.258	183.409	605.731	-1260.04	-1243.81	819.04
27	1	-2795.25	92.7156	-99.5312	71.2592	8571.69	-12895.4	-50107.6	3277.33	-815.662	-856.277	-802.884	-3999.5	-35390.3	-3.42599	-106.944	-205.983	-176.625	-337.449	-1780.91	-313.672	-1127.97	-1676.98	-188.314	-93.3144	146.566	-4870.29	2028.6	-619.447	-514.726	764.515	-3199.49	-81.4601	46.9801	22231.5	-2644.86	78.6759	-11350.6	10313.9	-642.342	230.589	-1946.01	205.293	5638.76	87.3439	209.357	853.68	675.802	635.38
28	0	-176.679	-26.0559	-267.45	26.7985	1326.42	-12713.3	-20347.8	-1604.82	212.681	-56.5676	23.294	-615.054	-153201	-91.9879	348.574	-517.441	3.84424	35.0105	-284.529	-76.0891	-1384.98	-465.294	-215.252	4433.75	183.306	-1361.47	443.784	-62.4111	-270.097	3069.3	2596.46	118.185	-296.513	19870.2	130.429	121.559	-16617.8	4042.93	-483.131	-3122.46	-9097.55	149.821	4616.73	10.3259	117.423	7903.89	47.3034	372.942
29	1	581.47	-28.6547	132.02	1562.07	2183.79	-10677.7	-14810.6	4234.84	-1321.03	21.9013	2.81466	1091.84	-33431.1	185.77	975.276	-463.326	13.4783	-581.338	-769.112	-227.542	8491.41	-246.841	-89.5585	-4047.45	-379.941	-2586.6	93.0706	-248.266	-118.751	8257.06	4672.69	166.331	497.112	31212.8	56.3573	-175.75	6117.8	11281.3	253.804	2886.03	747.01	383.311	-3154.45	27.0328	-1669.54	2287.09	979.527	329.837
30	0
31	0	-2409.2	-54.5915	110.164	33.549	-822.715	-7766.24	-59433.3	-496.208	-380.699	-268.249	254.982	-2319.33	-24836.7	-498.32	-877.158	-891.372	-1584.28	-541.771	-760.587	-329.414	-5004.28	-180.089	-63.6646	3209.86	-648.134	-1581.69	-1837.45	-37.1349	1787.66	-2062.18	536.847	211.75	-422.926	21194.7	8.97367	22.178	-20096.4	-12585.6	-624.523	-1148.78	420.456	-1087.73	-5077.33	-76.8982	139.699	923.256	-41.2981	50.4305
32	1	1189.71	29.437	-792.706	-135.325	-608.265	13370.7	-16667.8	4146.04	175.428	-45.699	-540.267	3527.31	-10945.1	-133.02	7639.42	-1067.12	25.7359	-143.95	-662.535	-297.128	3946.31	-382.544	-1.65738	3187.18	-345.444	88.6305	357.77	-40.9382	-18.2501	-1477.63	2332.87	-130.785	-323.558	20753.3	100.064	-110.256	-2485.58	-407.224	-124.415	-1841.71	-519.634	2489.77	232.548	60.6502	-147.803	-896.856	924.163	110.599
33	0	10116.2	2569.23	693.436	1823.19	-122.812	22587.4	-14676.6	3963.88	4675.49	5716.47	8279.03	18137.1	-35436.3	822.319	7921.58	1974.02	1714.52	1657.56	1312.5	294.909	8610.86	4811.53	1531.47	1687.31	1244.43	948.211	4947.93	5431.95	4614.31	3940.31	4248.36	526.765	914.466	20172.5	9508.73	1169.02	-9338.82	-2560.71	6749.36	1753.44	10277	1034.06	-1882.21	2334.19	1403.64	2354.7	3194.69	3534.76
34	0	24391.9	169.804	889.163	873.965	-2031.96	15809.2	-24552.7	6897.31	-435.555	117.544	1716.72	35711.6	-56187.9	202.374	-479.886	-1824.26	41.4212	-9.51508	-521.355	-245.93	28842.4	2559.63	652.075	-4915.23	-88.9114	-1146.41	-3032.7	561.614	3730.66	4720.43	35840.9	617.404	356.652	-9529.67	-1271.17	502.157	-41952.4	79956.7	63.1078	-2883.19	-6085.32	-124.445	419.396	157.984	554.054	139.408	1229.21	48.4862
35	1	-36.0342	111.297	-354.748	-66.9766	149.678	19725.5	1537.44	-140.119	-347.245	107.144	153.35	-2342.32	1004.03	-256.752	58.9031	-199.818	-956.347	424.065	-962.435	197.51	8163.87	12.2971	-1027.26	-4364.89	225.146	218.842	704.811	68.9046	-315.015	4021.02	-3012.92	-443.907	-79.874	18915.8	-916.414	-489.278	4777.38	5776.32	-324.326	188.378	417.897	386.938	-561.235	147.819	-652.362	-1.47769	964.345	126.48
36	1	9717.28	1.86689	-223.227	-561.554	1767.59	5545.99	14722.3	3762.08	158.921	-36.8155	200.67	13670.5	-75169.2	-2309.5	-180.827	-3768.08	-729.785	-144.9	-154.258	10.9067	10431.4	219.38	-837.84	3708.65	-66.591	818.069	1592.38	-119.106	-64.5201	2922.84	14886.2	-849.392	-431.047	45519.9	142.098	-1571.45	-1610.37	16904.4	865.76	1299.18	2324.16	5619.15	1133.28	5.1865	-1179.92	162.494	86.5469	531.119
37	0	-2597.87	-133.047	-1095.81	-1341.11	-2977.98	-7408.57	-45620.9	-3982.99	-169.238	-303.489	-870.25	-980.928	-265218	116.861	-445.636	-391.871	-1370.6	157.204	-468.315	-261.904	-5772.36	-505.472	-686.177	8958.2	-495.345	429.277	-2015.5	210.078	-275.155	-2334.29	-442.008	-343.12	-365.987	-14995.9	-326.804	-169.55	-60077.3	-8070.35	134.027	-14395.9	-2504.74	-751.324	2208.97	-76.899	-337.354	-1775.83	514.824	227.182
38	0	-2411.34	-932.203	-1074.18	137.662	-1017.85	-7115.38	-45.6917	-2181.39	-556.238	-120.141	12.7284	-152.946	434.312	-25.0417	377.866	162.576	626.469	-64.361	-640.227	212.27	-5784.39	-202.729	-247.232	389.302	-212.503	-208.943	-3483.16	-303.758	-2532.05	-2564.6	4872.34	-74.8791	-673.225	2286.43	4.57443	223.972	38.1497	1214.15	-601.602	-2150.53	-3819	225.534	941.192	-1090.64	233.651	-2312.92	-3109.33	-2104.77
39	0	-927.411	52.6796	-109.833	-45.4856	-1613.71	12345.8	-15984	-5028.35	-3896.85	-45.407	-124.805	-332.856	-8463.17	-1153.65	547.398	-233.273	-1140.83	-1378.09	-678.137	-103.729	-538.202	-366.491	202.244	9269.25	-618.312	-699.811	-3220.14	-702.605	-2981.58	-1439.46	2309.47	75.3918	-81.8351	14775.2	94.0845	295.095	-16943	12866.4	-3482.73	-10574.9	-7167.01	1092.99	-2531.01	31.3468	-16.9223	-3909.16	-102.289	-2865.42
40	0	-2480.15	159.732	114.02	-152.38	-2919.2	20134.5	-7117.67	2656.11	-9.53802	32.6615	153.085	-3541.01	-3025.44	-1139.12	590.621	-328.826	-169.97	-558.935	-308.448	-103.975	5524.96	-219.323	-72.1123	5364.21	39.5034	-888.629	-208.799	-229.262	535.041	1366	-2040.12	-53.6546	-462.074	-6135.08	-208.297	27.5435	-7570.78	7969.99	616.536	-21469.5	-529.891	-880.369	-289.357	-31.7429	-748.056	43.5077	-434.063	124.23
42	0	-44436.9	-511.822	-64.8607	202.084	2518.08	-1227.79	-86172.7	2214.77	-1075.28	-914.974	-3258.51	-69094.7	-37013.2	-499.706	-916.766	-102.264	-1490.91	-476.214	-530.047	-321.059	-31343	-5699.36	264.114	4294.48	-395.33	-1723.91	319.266	-2207.04	-723.717	-2233.78	-34208.7	-131.471	-981.654	-400.61	-4314.92	-137.158	-67347.7	-12668.9	-2601.27	-8105.35	-3786.48	-1667.27	-3166.99	89.9265	-1409.93	-213.493	-962.224	269.092
43	0	241.987	-25.1059	395.884	712.419	1952.29	2966.04	-35504.8	-201.201	1664.25	39.5475	-1848.95	-2092.99	-20816.7	-329.457	-5243.43	-138.334	-230.91	572.572	-491.649	-424.711	-2217.11	-422.184	322.073	11734.1	241.141	-1165.09	-366.21	782.26	3768.23	-1226.4	1265.17	407.359	157.165	2624.35	402.82	228.507	-25970.1	18207.9	-387.962	-1904.15	-1050.08	2382.41	5870.98	14.5356	214.181	2415.28	337.049	849.419
44	0	-242.201	96.6362	144.358	411.741	2225.74	23156	-26935.7	3063.46	-147.286	-149.752	114.602	-5136.88	-38667.2	-35.7649	-5610.11	-554.467	42.04	267.329	-392.322	-39.8861	-4541.22	-181.209	41.9045	-13607.3	184.894	-911.845	-2580.8	374.419	785.21	-2356.97	429.085	437.229	126.993	2320.97	-751.159	-71.1574	-11126	2650.54	-904.609	-2726.23	-5387.78	1230.33	260.381	-71.6657	188.155	927.301	-491.249	235.187
45	1	243.45	265.035	393.031	1150.02	-7005.88	-4388.05	-67122.8	6270.44	1627.31	-231.464	134.769	407.724	-120794	2292.19	-391.885	6944.39	-337.319	2125.42	779.747	-462.366	7489.37	-578.742	794.74	-2550.77	-1622.11	-1545.52	-3314.33	316.281	1637.76	-1986.41	-575.111	814.289	382.046	-12506.9	-662.004	975.317	-766.136	7069.05	2061.99	2278.46	-170.115	-674.173	-1229.35	-110.993	1258.95	3246.56	-3495.53	459.95
46	0	-2250.26	-214.563	67.1931	157.907	1894.15	1503.03	-49752.5	-928.369	-393.246	-206.42	3.2141	1009.83	-77717.4	-270.334	262.022	-526.751	-404.376	-142.245	-790.572	-293.16	-3314.86	-461.899	-372.927	5581.95	-200.253	-134.892	-624.339	-428.446	-96.2944	1395.18	-916.088	-19.4511	-208.139	6777.09	-35.9487	-532.343	-56598	1637.74	-1058.47	-9823.25	-8829.89	463.764	-1378.9	-403.609	281.533	9167.02	-196.071	-157.149
47	0	-746.046	-33.7192	-2218.55	-936.711	2631.29	3308.28	-6044.82	1815.19	488.335	30.1243	259.09	-1770.88	-4444.41	211.598	-353.727	269.486	390.712	617.059	365.683	-737.976	-18414.7	-440.234	107.789	1811.84	65.153	-886.923	227.073	537.257	798.96	5917.63	422.135	-162.246	-450.576	5643.32	1006.97	-120.967	-22932.9	-6709.28	769.047	-16503	-2933.51	2727.22	2214.02	-227.503	-1187.41	1272.97	-124.446	801.511
48	1	-2537.52	-133.526	338.778	-350.672	-2478.93	-9951.24	-31944.5	1253.43	-1510.75	-207.169	-446.075	-4821.7	-121376	-386.554	-877.48	-921.248	-434.524	-357.065	-1143.35	-395.304	2140.39	-1396.67	-45.1071	3826.18	105.372	-297.937	870.979	978.684	18.9307	6504.04	1126.04	-323.223	-655.884	16700.6	-348.679	-631.262	-19896	12187	-1370.77	-545.348	-4449.06	-3029.58	-3809.06	-173.744	141.696	-2999.26	2275	667.727
49	0	-5748.79	-356.088	-768.202	-864.251	-669.623	-2087.93	-3863.12	1576.12	-2000.8	-127.424	-1778.95	-7175.55	-8010.24	-798.209	-368.494	-1173.7	-860.843	-1732.38	-1243.4	-298.202	-11588.1	-901.477	-280.092	3949.25	-1091.03	-594.358	-2723.74	-1435.01	-538.931	309.834	-2970.24	-80.2821	-399.988	3067.26	-2332.48	-114.359	-9388.25	-1366.13	-1500.09	-777.066	-3697.02	-1254.43	384.035	-418.794	-347.998	-1922.87	-1384	-1603.7
50	0	-1632.56	-25.3097	-742.255	-158.42	1882.98	683.372	-965.636	2323.61	-2081.09	896.675	97.0521	-3549.42	-12628.1	-2239.31	-73.174	-1992.71	-1489.4	-1361.11	-2145.37	-278.371	-5768.51	49.2135	-507.752	10041.4	-52.9432	107.319	320.252	445.729	-136.499	2811.9	727.292	-226.402	-191.138	18407.8	523.723	-337.455	2830.5	575.03	-3004.24	-599.792	-263.519	1285.85	-173.844	116.245	-846.571	-1539.79	98.2148	590.223
51	0	-23.1902	-176.463	-95.0467	-734.014	1905.35	-8600.57	-3116.84	-1644.56	595.885	314.043	-152.203	-5530.3	-11563.7	116.039	-401.654	16.5101	-100.011	467.025	345.373	-331.602	-14707.2	-290.4	-91.0799	2496.28	-72.3113	-99.2189	150.585	-96.0508	1530.65	6076.24	-9661.29	187.419	-554.287	20646.4	-360	-299.689	-9562.31	-13894	825.802	-891.248	-1668.04	373.131	-1582.91	127.637	-70.1997	-1253.56	1865.04	-188.043
52	0	-55.3518	-117.911	629.711	426.956	-1273.83	526.919	617.734	3726.51	1610.65	8.15941	249.747	-607.281	-6496.29	186.41	-72.4385	460.633	391.595	726.398	92.8194	-207.098	2151.84	-573.548	41.2958	-7104.98	387.057	-469.393	1459.85	497.223	187.577	2116.37	-1306.88	-129.251	-68.5587	21881.3	529.875	47.1816	-2457.26	-2903.73	963.182	-270.173	1602.07	-100.358	-743.736	-51.4103	-387.818	-460.592	340.86	121.081
	P VALUES	0.325	0.101	0.778	0.708	0.606	0.325	0.815	0.075	0.542	0.542	0.963	0.325	0.708	0.888	0.743	0.348	0.639	0.708	0.542	0.778	0.015	0.574	0.482	0.373	0.963	0.851	0.133	0.708	0.281	0.146	0.743	0.189	0.453	0.174	0.373	0.159	0.022	0.189	0.888	0.003	0.241	0.778	0.743	0.453	0.639	0.815	0.325	0.223
[truncated: 152 more columns]
